1 **Airway antibodies wane rapidly after COVID-19 but B cell memory is generated across**  
2 **disease severity**

3  
4 Alberto Cagigi<sup>1</sup>, Meng Yu<sup>1</sup>, Sara Falck-Jones<sup>1</sup>, Sindhu Vangeti<sup>1</sup>, Björn Österberg<sup>1</sup>, Eric  
5 Åhlberg<sup>1</sup>, Lida Azizmohammadi<sup>1</sup>, Ryan Falck-Jones<sup>2,3</sup>, Pia C Gubisch<sup>1</sup>, Mert Ödemis<sup>1</sup>,  
6 Farangies Ghafoor<sup>1</sup>, Klara Lenart<sup>1</sup>, Max Bell<sup>2,3</sup>, Niclas Johansson<sup>4,5</sup>, Jan Albert<sup>6,7</sup>, Jörgen  
7 Sälde<sup>8</sup>, Deleah Pettie<sup>9,10</sup>, Michael Murphy<sup>9,10</sup>, Lauren Carter<sup>9,10</sup>, Neil P King<sup>9,10</sup>, Sebastian Ols<sup>1</sup>,  
8 Anna Färnert<sup>4,5</sup>, Karin Loré<sup>1\*</sup> and Anna Smed-Sörensen<sup>1\*</sup>

9  
10 <sup>1</sup>Division of Immunology and Allergy, Department of Medicine Solna, Karolinska Institutet,  
11 Karolinska University Hospital, Stockholm, Sweden. <sup>2</sup>Department of Physiology and  
12 Pharmacology, Karolinska Institutet, Stockholm, Sweden. <sup>3</sup>Department of Perioperative  
13 Medicine and Intensive Care, Karolinska University Hospital, Stockholm, Sweden. <sup>4</sup>Division of  
14 Infectious Diseases, Department of Medicine Solna, Center for Molecular Medicine,  
15 Karolinska Institutet, Sweden. <sup>5</sup>Department of Infectious Diseases, Karolinska University  
16 Hospital Solna, Stockholm, Sweden. <sup>6</sup>Department of Microbiology, Tumor and Cell Biology,  
17 Karolinska Institutet, Stockholm, Sweden. <sup>7</sup>Clinical Microbiology, Karolinska University  
18 Hospital Solna, Stockholm, Sweden. <sup>8</sup>Närakut SLSO, Karolinska University Hospital Solna,  
19 Stockholm, Sweden. <sup>9</sup>Department of Biochemistry, University of Washington, Seattle, WA  
20 98195, United States. <sup>10</sup>Institute for Protein Design, University of Washington, Seattle, WA  
21 98195, United States. \*Equal contribution.

22  
23 **Correspondence to:**

24 Karin Loré and Anna Smed-Sörensen, Division of Immunology and Allergy, Department of  
25 Medicine Solna, Karolinska Institutet, Visionsgatan 4, BioClinicum J7:30, Karolinska  
26 University Hospital, 171 64 Stockholm, Sweden.  
27 e-mail addresses: [karin.lore@ki.se](mailto:karin.lore@ki.se); [anna.smed.sorensen@ki.se](mailto:anna.smed.sorensen@ki.se)

28  
29 **Conflict of interest statement**

30 The authors have declared that no conflict of interest exists.

31  
32  
33 **Summary**

34  
35 COVID-19 severity determines the level of systemic and airway IgG and IgA but while IgG are  
36 maintained in plasma during convalescence, antibodies wane rapidly in the airways.  
37 However, comparable levels of antigen-specific memory B cells are generated across disease  
38 severity.

40 **Abstract**

41

42 Understanding immune responses following SARS-CoV-2 infection in relation to COVID-19  
43 severity is critical for predicting the effects of long-term immunological memory on viral  
44 spread. Here we longitudinally assessed systemic and airway immune responses against  
45 SARS-CoV-2 in a well-characterized cohort of 147 infected individuals representing the full  
46 spectrum of COVID-19 severity; from asymptomatic infection to fatal disease. High systemic  
47 and airway antibody responses were elicited in patients with moderate to severe disease,  
48 and while systemic IgG levels were maintained after acute disease, airway IgG and IgA  
49 declined significantly. In contrast, individuals with mild symptoms showed significantly lower  
50 antibody responses but their levels of antigen-specific memory B cells were comparable with  
51 those observed in patients with moderate to severe disease. This suggests that antibodies in  
52 the airways may not be maintained at levels that prevent local virus entry upon re-exposure  
53 and therefore protection via activation of the memory B cell pool is critical.

54

55

## 56 Introduction

57  
58 Severe acute respiratory syndrome coronavirus 2 (SARS-CoV-2) infection that causes  
59 coronavirus disease 2019 (COVID-19) can present with a wide range of disease severity from  
60 asymptomatic to fatal. Individuals of advanced age and/or those with comorbidities are  
61 overrepresented among patients who develop severe disease (Zaki et al., 2020). However,  
62 the majority of SARS-CoV-2 infected individuals experience asymptomatic infection or only  
63 mild disease (Moghadas et al., 2020). Understanding immune responses following SARS-CoV-  
64 2 infection in relation to COVID-19 severity is critical for predicting long-term immunological  
65 memory and the potential risk for re-infection or virus spread. Whether patients with  
66 different disease severities generate similar protective immunity is still unknown. Here we  
67 present longitudinal data on virus-specific systemic and airway antibody and B cell memory  
68 responses generated in a clinically well-characterized cohort of individuals with SARS-CoV-2  
69 infection (n=147) representing the full spectrum of COVID-19 severity ranging from  
70 asymptomatic infection to fatal disease.

71

72

## 73 Results and discussion

74

75 Individuals were sampled during disease and convalescence with longitudinal, donor-  
76 matched blood and airway samples. The levels of systemic and airway antibody responses as  
77 well as the generation of SARS-CoV-2-specific memory B cells were measured. Plasma,  
78 peripheral blood mononuclear cells (PBMC), nostril swabs (NSW) and nasopharyngeal  
79 aspirates (NPA) were collected across all disease severities whereas endotracheal aspirates  
80 (ETA) were collected only from intubated patients receiving intensive care (Figure 1A).  
81 Disease severity was assessed daily, using a seven-point scale derived from the respiratory  
82 domain of the sequential organ failure assessment (SOFA) score (Grissom et al., 2010;  
83 Vincent et al., 1996), with additional levels for non-admitted mild cases (1) and fatal cases  
84 (7). Patients were later grouped based on peak disease severity (PDS) (Table 1). In addition,  
85 pre-pandemic healthy controls (PPHC) (n=30) as well as individuals who experienced  
86 influenza-like symptoms and were possibly exposed to SARS-Cov-2 but had a negative  
87 diagnostic PCR (PCR-) (n=9) were sampled in the same way and included as controls.

88

89 We first assessed systemic IgG and IgA responses at the time of study inclusion that ranged  
90 between 0-54 days from onset of symptoms; median 16 days. Generally, patients with the  
91 highest peak disease severity score were included in the study after they had already been  
92 hospitalized for a number of days (Figure 1B) (Falck-Jones et al., 2020). Therefore, these  
93 individuals were sampled longer after symptom onset as compared with individuals with  
94 mild disease resulting in a large time frame of study inclusion with respect to symptom onset  
95 (Table 1). For simplicity, this sampling period/study inclusion is referred to as the “acute”  
96 phase. Samples collected at the first follow-up visit (46-168 days; median 108 days) are  
97 referred to as the “convalescent” phase. Time of convalescent from acute sampling ranged  
98 based on individual patient recovery and their disease severity (33-159 days; median 90  
99 days). Plasma IgG and IgA against the SARS-CoV-2 nucleocapsid (N) and spike (S) proteins as  
100 well as the receptor binding domain (RBD) (Walls et al., 2020; Wrapp et al., 2020) of the S  
101 protein were measured by ELISA. Antibody responses against the internal N protein have  
102 been shown to be elevated in deceased individuals but whether these antibodies contribute

103 to disease severity is unknown (Atyeo et al., 2020; Guthmiller et al., 2020). In contrast,  
104 antibody responses against the viral surface protein S and, in particular, against the RBD  
105 result in virus neutralization (Piccoli et al., 2020). Responses against the RBD are thus likely  
106 necessary for protection from re-infection or prevention of symptomatic disease.

107  
108 In line with previous reports (Atyeo et al., 2020; Gaebler et al., 2020; Gudbjartsson et al.,  
109 2020; Guthmiller et al., 2020; Zhao et al., 2020), plasma IgG and IgA responses against N, S  
110 and RBD were robust in acute disease in the majority of individuals with moderate to severe  
111 disease while they were substantially lower in individuals with mild disease (Figure 2A).  
112 However, in our cohort, this might also partially be due to earlier study inclusion of patients  
113 with mild symptoms (median days from onset of symptoms 11 as compared with 13 and  
114 21.5 in the moderate and severe groups respectively, and 13 in the fatal group) (Table 1). In  
115 fact, while plasma IgG levels remained high in the patients with moderate to severe disease  
116 in the convalescent phase, levels had increased in the individuals with mild disease and all  
117 had seroconverted (Figure 2A). In contrast, IgA levels from the acute phase, against all  
118 antigens, waned substantially during convalescence in most patients (Figure 2A). While the  
119 levels of IgG against the RBD (Figure 2B), as well as against N and S (Figure S1A), exhibited a  
120 positive correlation with days from onset of symptoms during the acute phase, this was less  
121 pronounced for IgA levels. Furthermore, patients with mild disease displayed lower levels of  
122 plasma IgG against RBD as compared with more severe patients, also when samples were  
123 taken after similar duration of symptoms (Figure 2A-B and Figure S1B). Altogether, these  
124 data confirm that the generation of IgA likely precede that of IgG. Earlier reports of  
125 individuals with asymptomatic infection or mild disease also showed robust early IgA  
126 responses (Cervia et al., 2020; Staines et al., 2020; Sterlin et al., 2020).

127  
128 Comparable to another study (Hansen et al., 2020), the levels of both plasma IgG and IgA  
129 against all antigens tested, during both acute disease and convalescence, were significantly  
130 higher in patients with more severe disease compared to mild, both when comparing  
131 disease severity at time of study inclusion and initial sampling as well as when grouping the  
132 patients based on their peak disease severity (Figure S2A). When comparing antibody levels  
133 between disease severity groups based on when patients were sampled after disease onset,  
134 patients with moderate or severe disease on average tended to have higher antibodies  
135 compared to those with mild disease already during the first week of symptom onset and  
136 were more pronounced after 2, 3 and >3 weeks of symptom onset (Figure S1B). However,  
137 these differences were not statistically significant in our cohort, probably due to uneven  
138 inclusion over time in the different disease severity groups. In our cohort, the difference in  
139 antibody titers over time was further supported by the fact that the patients with  
140 moderate/severe disease, and even fatal outcome, for whom we initially observed low IgG  
141 titers against RBD, had an early study inclusion (on average 13 days from onset of  
142 symptoms); but showed significantly higher titers later during the acute phase (on average  
143 19 days) (Figure 2C-D). Similar kinetics of anti-RBD responses have previously been noted in  
144 different patient cohorts (Lynch et al., 2020; Robbiani et al., 2020; Rydzynski Moderbacher  
145 et al., 2020).

146  
147 As the respiratory tract is the initial site of viral infection and replication, we next measured  
148 the levels of IgG and IgA in the upper and lower airways and compared with levels in plasma  
149 at matched time points. Due to limited sample volumes, we focused our analyses on IgG and

150 IgA responses against the RBD since these responses are likely most critical for virus  
151 neutralization. We found that RBD-specific antibodies could be readily detected in NSW and  
152 NPA during the acute phase in several patients across all disease severities (Figure 3A and B).  
153 In agreement with our observations in plasma, antibody levels in the upper respiratory tract  
154 were higher in patients with moderate or severe disease as compared with individuals with  
155 mild disease. Both IgG and IgA levels declined significantly in the convalescent phase, with  
156 IgG declining to almost undetectable levels (Figure 3A and B). This demonstrates that airway  
157 antibody levels wane much faster than those in plasma during convalescence. Low but  
158 detectable levels of antibodies to SARS-CoV-2 have previously been reported also in saliva  
159 during convalescence (Isho et al., 2020). However, whether these low antibody levels at  
160 mucosal sites will be sufficient for protection is not known. We found that RBD-specific IgG  
161 and IgA levels in the respiratory tract correlated well with those in plasma during the acute  
162 phase but to a lesser extent during convalescence (Figure 3C and Figure S2B). When  
163 comparing donor-matched NSW, NPA and ETA collected at the same time point during acute  
164 disease from intubated patients, significantly higher levels of IgA against the RBD were found  
165 in NPA as compared with NSW and ETA (Figure 3D). While this could be partially influenced  
166 by differences in sampling method and sample volume, these data suggest that antibody  
167 abundance and possibly virus neutralization via IgA differs along the respiratory tract and  
168 may be more pronounced in the nasopharynx compared to the lower airways. Hence,  
169 nasopharynx antibodies (both IgG and IgA) showed a strong correlation with plasma  
170 antibody responses (Figure 3D and Figure S2B). We also assessed the presence of B cells in  
171 the respiratory tract of COVID-19 patients by analyzing the lymphocytes that could be  
172 retrieved from NPA and ETA as compared with NPA from three additional healthy controls  
173 (HC). Lymphocyte frequencies were lower in both NPA and ETA from several COVID-19  
174 patients as compared with NPA from HC. The proportion of B cells of lymphocytes was  
175 similar in NPA from HC and COVID-19 patients. However, the proportion of B cells in ETA of  
176 COVID-19 patients was lower compared to NPA, which possibly contributes to the higher  
177 antibody levels at this site (Figure 4A and B).

178  
179 Altogether, the data presented so far confirm that moderate and severe COVID-19 result in  
180 high levels of circulating antibodies and show that despite IgG being well-maintained during  
181 convalescence, antibody levels in the airways decline significantly after the acute phase.  
182 Generally, antibodies present in circulation and at local sites are the result of secretion from  
183 short-lived plasmablasts and/or terminally differentiated plasma cells in the bone marrow or  
184 mucosal sites (Zielinski et al., 2011). The response to a secondary infection once antibody  
185 titers have waned below protective levels mostly relies on the presence of resting antigen-  
186 specific memory B cells that are rapidly activated upon antigen re-exposure (Zielinski et al.,  
187 2011). We therefore investigated the induction and maintenance of antigen-specific  
188 memory B cells similar to other studies (Dan et al., 2020; Juno et al., 2020; Rodda et al.,  
189 2020). We focused on the direct comparison between individuals with mild disease and  
190 patients with moderate/severe disease, along with individuals who had reported mild  
191 influenza-like symptoms but were SARS-CoV-2 PCR-. Patients with moderate/severe disease  
192 who had high circulating IgG and IgA levels were specifically selected for the analysis to be  
193 able to compare the opposite ends of the COVID-19 disease spectrum. Donor-matched  
194 PBMC from acute disease and convalescence were analyzed side-by-side using fluorescently  
195 labelled S and RBD probes to detect antigen-specific B cells (Dan et al., 2020; Juno et al.,  
196 2020; Rodda et al., 2020). Patients with moderate/severe disease had switched memory B

197 cells specific to S in the acute phase and the memory B cell pool had further expanded in the  
198 convalescent phase (ranging from 0.009 to 1.35%; mean 0.42% during convalescence)  
199 (Figure 4C-F). Individuals with mild disease showed lower memory B cells during acute  
200 disease than the patients with moderate/severe disease, but the levels had increased by the  
201 time of convalescent sampling (ranging from 0.17% to 0.64%; mean 0.35% during  
202 convalescence) and were comparable between the groups (Figure 4E and F). Further  
203 phenotyping of the S-specific memory B cells indicated that the majority of these cells may  
204 be specific for epitopes on S outside of the RBD (Figure 4D). However, it is possible that  
205 binding of B cells to RBD could be underestimated as RBD is also present in the S protein. S-  
206 specific memory B cells in the circulation were predominantly IgG+, rather than IgA+ (Figure  
207 4D). Low frequencies of S and RBD-specific memory B cells were observed in the PCR-  
208 individuals. However, these were not significantly different from the levels observed in PPHC  
209 (Figure 4C and E). Collectively, since the majority of individuals infected with SARS-CoV-2 are  
210 either asymptomatic or experience only mild COVID-19 symptoms (Moghadas et al., 2020),  
211 the possibility of generating antigen-specific memory B cells without experiencing severe  
212 disease, would be very important in the prospect of establishing potential immunity at the  
213 population level.

214  
215 In summary, here we show that COVID-19 disease severity not only determines the  
216 magnitude of systemic but also airway antibody levels with efficient generation of virus-  
217 specific memory B cells against SARS-CoV-2 also occurring upon mild disease. While plasma  
218 IgG levels were generally well detectable at convalescence in all groups, there was a  
219 significant decline in airway antibodies after the clearance of infection. This suggests that  
220 antibodies in the airways may not be maintained at levels that prevent local virus entry upon  
221 re-exposure. However, our data indicate that the majority of infected individuals have the  
222 ability to generate anamnestic responses via the memory B cell pool. Speculatively, the  
223 antibodies and memory B cell pool may play a role for protection or mitigation of disease  
224 severity in case of re-infection. Whether sufficient number of memory B cells will be  
225 maintained long-term and to what extent they will prevent the spread of SARS-CoV-2 at the  
226 population level remain to be understood. This is critical knowledge to acquire in the near  
227 future to evaluate together with the memory B cell response generated after the  
228 introduction of SARS-CoV-2 vaccination. Ultimately, the requirements for establishment of  
229 long-term protection and immunity will need to be determined.

230

231

## 232 **Materials and methods**

233

### 234 **Study design, patient enrollment and sample collection**

235 One hundred and forty-seven (147) PCR-confirmed SARS-CoV-2 infected patients were  
236 enrolled at the Karolinska University Hospital and Haga Outpatient Clinic (Haga Närakut),  
237 Stockholm, Sweden during March-May 2020 (acute phase) in a time that ranged from 0 to  
238 54 days from onset of symptoms as self-reported by individual patients; and during April-  
239 September 2020 (convalescence) in a time that ranged from 46 to 168 days continuing from  
240 the previous counts. Patients were enrolled at various settings, ranging from primary to  
241 intensive care. In order to recruit asymptomatic and mild cases, household contacts of  
242 COVID-19 patients were screened with PCR and enrolled if positive. A small subset of these  
243 individuals who experienced influenza-like symptoms and were possibly exposed to SARS-

244 Cov-2 but had a negative diagnostic PCR (PCR-) (n=9 of whom 3 were household contacts of  
245 confirmed patients with 1 experiencing fever, and 6 were included based on suspected  
246 infection with 4 experiencing fever) were sampled in the same way and included as controls  
247 alongside with 30 pre-pandemic healthy control samples (PPHC) from 2016-2018.  
248

249 Respiratory failure was categorized daily according to the respiratory domain of the  
250 Sequential Organ Failure Assessment score (SOFA)(Vincent et al., 1996). The modified SOFA  
251 score (mSOFA) was calculated when arterial partial pressure of oxygen (PaO<sub>2</sub>) was not  
252 available. In this case peripheral transcutaneous hemoglobin saturation (SpO<sub>2</sub>) was used  
253 instead (Grissom et al., 2010). Estimation of the fraction of inspired oxygen (FiO<sub>2</sub>) based on  
254 O<sub>2</sub> flow was calculated as per the Swedish Intensive Care register definition  
255 (Intensivvårdsregistret, 2018). Patients were categorized based on the peak respiratory  
256 SOFA or mSOFA value with the 5-point respiratory SOFA score being extended with  
257 additional levels to include and distinguish admitted asymptomatic and non-  
258 admitted/admitted mild cases and to include fatal outcome added as a seventh level. Ten  
259 (10) patients with fatal outcome had peak disease severity score 6 prior to death and 2  
260 patients had scores of 4 and 5. For convenience, the resulting 7-point composite peak  
261 disease severity (PDS) was condensed into a broader classification consisting of mild (1-2),  
262 moderate (3-4), severe (5-6), and fatal (7). Demographics and additional data were collected  
263 from medical records, including clinical history and risk factors such as BMI and co-  
264 morbidities. Total burden of comorbidities was assessed using the Charlson co-morbidity  
265 index (CCI) (Charlson et al., 1987) (Table 1). Additional clinical information on this patient  
266 cohort including the modulation of disease from time to study inclusion to peak severity can  
267 be found in Falck-Jones et al (Falck-Jones et al., 2020).  
268

269 Blood was collected in EDTA-containing tubes from all patients except those admitted to the  
270 intensive care unit (ICU) for whom blood was pooled from heparin-coated blood gas syringes  
271 discarded in the last 12 hours. For some ICU patients, additional venous blood was also  
272 collected in EDTA tubes. Nostril swabs (NSW) and nasopharyngeal aspirates (NPA) were  
273 collected from the majority of the patients whereas endotracheal aspirates (ETA) were only  
274 collected from patients with mechanical ventilation intubated in the ICU. Admitted patients  
275 were sampled during acute disease at up to four timepoints and ICU patient material was  
276 collected up at to ten timepoints. For this study, unless otherwise stated, the measurements  
277 referring to acute disease were performed with samples collected at the time of study  
278 inclusion and during convalescence when patients returned for a follow-up visit.  
279

280 The study was approved by the Swedish Ethical Review Authority, and performed according  
281 to the Declaration of Helsinki. Written informed consent was obtained from all patients and  
282 controls. For sedated patients, the denoted primary contact was contacted and asked about  
283 the presumed will of the patient and to give initial oral and subsequently signed written  
284 consent. When applicable retrospective written consent was obtained from patients with  
285 non-fatal outcomes.  
286

### 287 **Enzyme-linked immunosorbent assay (ELISA)**

288 The presence of IgG or IgA binding against the SARS-Cov-2 Nucleocapsid (N) and Spike (S)  
289 trimer or the Receptor Binding Domain (RBD) monomer (Walls et al., 2020) in plasma and  
290 airway samples was assessed by enzyme-linked immunosorbent assay (ELISA). Recombinant

291 proteins were received through the global health-vaccine accelerator platforms (GH-VAP)  
292 funded by the Bill & Melinda Gates Foundation. Briefly, 96-half well plates were coated with  
293 50ng/well of the respective protein. Plates were incubated with a selected duplicate dilution  
294 that did not provide background noise against ovalbumin used as a negative control (data  
295 not shown) (i.e. 1:20 for plasma samples, 1:2 for NSW and NPA, and 1:5 for ETA in 5%  
296 milk/PBS buffer). Duplicate 7-point serial dilutions were initially performed for measuring  
297 plasma IgG against RBD during acute disease and the half maximal effective concentration  
298 ( $EC_{50}$ ) was calculated using GraphPad Prism 9. However, since for several samples with low  
299 antibody concentration (mostly from the asymptomatic/mild category) the  $EC_{50}$  was below  
300 the highest dilution used (of 1:20) and therefore below the limit of detection (Figure S3A),  
301 the maximal optical density (OD) at 1:20 dilution was used instead for this and for all the  
302 other measurements subsequently performed. The relation with maximal OD and  $EC_{50}$  was  
303 also verified in a subset of patients with high IgG and IgA against S (Figure S3B). Detection  
304 was performed with mouse and goat anti-human IgG or IgA HRP-conjugated secondary  
305 antibodies (clone G18-145 from BD Biosciences and polyclonal from ThermoFisher,  
306 respectively) followed by incubation with TMB substrate (BioLegend) which was stopped  
307 with a 1M solution of sulfuric acid. Blocking with 5% milk/PBS buffer and washing with 0.1%  
308 Tween-20/PBS buffer were performed between each step. Absorbance was read at 450nm  
309 and background correction at 550nm using an ELISA reader. Data were reported as maximal  
310 absorbance i.e. OD, as stated above, and plotted using GraphPad Prism 9. All of the antibody  
311 measurements in plasma and respiratory samples from SARS-CoV-2 patients were run  
312 alongside with samples from two different control groups as described above. Interestingly,  
313 low but readily detectable IgA reactivity against S was detected in the pre-pandemic healthy  
314 controls and in the PCR- individuals (Figure S3C). After having verified the specificity and  
315 sensitivity of our ELISA assay for IgA detection with limiting sample dilutions (Figure S3D), we  
316 hypothesize that this might be due to cross-reactivity on the shared portions of the S protein  
317 between SARS-CoV-2 and other common cold coronaviruses. Reports have shown that cross-  
318 reactivity between coronaviruses exists (Grifoni et al., 2020; Song et al., 2020).

319

### 320 **Flow cytometry**

321 Staining of cells from airway samples was performed fresh. Briefly, samples were centrifuged  
322 at 400 g for 5 min at room temperature and cells were washed with sterile PBS. Mucus was  
323 removed using a 70  $\mu$ m cell strainer and cells were subsequently stained with the  
324 appropriate combination of fluorescently labelled monoclonal antibodies as illustrated in  
325 Figure 4A. Staining of PBMC was performed on previously cryopreserved samples. The  
326 appropriate combination of fluorescently labelled monoclonal antibodies binding to  
327 different cell surface markers and with fluorescently labelled S and RBD proteins used as  
328 probes for antigen-specific B cells is illustrated in Figure 4C. Probes were prepared from  
329 biotinylated proteins using a 4:1 molar ratio (protein:fluorochrome-labelled streptavidin)  
330 considering the molecular weight of protein monomers and of the streptavidin only. The  
331 probes were prepared using streptavidin conjugated to PE and APC for S and with BV421 for  
332 the RBD. The gating strategy for the identification of antigen-specific memory B cells is  
333 shown in Figure 2d. Briefly, after identification of lymphocytes in single suspension, live B  
334 cells, (i.e. cells not expressing CD3/,CD14/CD16/CD56) were gated. From this gate, B cells  
335 were further isolated by expression of CD19 and CD20 and then switched memory B cells  
336 were identified as IgD-IgM-. From these, S-specific switched memory B cells were identified  
337 by binding to both S protein probes. Further characterization was then carried out by



338 analyzing IgG expression (IgA+ switched memory B cells are assumed to mirror IgD-IgM-IgG-  
339 B cells) and fluorescently labelled RBD. Stained cells from airway samples were acquired  
340 using a BD LSRFortessa while stained PBMC were acquired using a BD FACSAria Fusion both  
341 interfaced with the BD FACSDiva Software. Results were analyzed using BD FlowJo version  
342 10.

343

#### 344 **Statistical analyses**

345 All statistical analyses were performed using GraphPad Prism 9. Spearman correlation was  
346 used to assess the interdependence of 2 different non-categorical parameters across  
347 individuals whereas Wilcoxon matched-pairs signed rank or Mann–Whitney U tests as  
348 appropriate, were used to assess differences or similarities for one single parameter  
349 between 2 different groups. Kruskal -Wallis with Dunn’s multiple comparisons test was used  
350 when assessing comparison between multiple groups.

351

352

#### 353 **Author contributions**

354 Experimental study design: A.C., Ka.L. and A.S-S. Clinical concept design: A.S-S., M.B., N.J.,  
355 J.A., J.S. and A.F. Acquisition and sample processing: M.Y., S. F-J., S.V., B.Ö., E.Å., L.A., R.F-J.,  
356 M.Ö. and F.G. Generation of data: A.C., M.Y., S. F-J., S.V. and P.C.G. Provision of custom  
357 reagents: D.P., M.M., L.C., and N.P.K. Analysis and interpretation of data: A.C., Ka.L. and A.S-  
358 S. Critical revision of the manuscript: all authors. Statistical analysis: A.C., K.L. and S.O. Ka.L.  
359 and A.S-S. contributed equally to the study.

360

361

#### 362 **Acknowledgments**

363 We thank the patients and healthy volunteers who have contributed to this study. We would  
364 also like to thank medical students and hospital staff for assistance with patient sampling  
365 and collection of clinical data, the Biomedicum BSL3 core facility, Karolinska Institutet and  
366 Fredrika Hellgren for assistance with English editing. This work was supported by grants from  
367 the Swedish Research Council, the Swedish Heart-Lung Foundation, the Bill & Melinda Gates  
368 Foundation, the Knut and Alice Wallenberg Foundation through SciLifeLab and Karolinska  
369 Institutet.

370

371

## 372 References

373

374 Atyeo, C., S. Fischinger, T. Zohar, M.D. Slein, J. Burke, C. Loos, D.J. McCulloch, K.L. Newman,  
375 C. Wolf, J. Yu, K. Shuey, J. Feldman, B.M. Hauser, T. Caradonna, A.G. Schmidt, T.J.  
376 Suscovich, C. Linde, Y. Cai, D. Barouch, E.T. Ryan, R.C. Charles, D. Lauffenburger, H.  
377 Chu, and G. Alter. 2020. Distinct Early Serological Signatures Track with SARS-CoV-2  
378 Survival. *Immunity* 53:524-532 e524.

379 Cervia, C., J. Nilsson, Y. Zurbuchen, A. Valaperti, J. Schreiner, A. Wolfensberger, M.E. Raeber,  
380 S. Adamo, M. Emmenegger, S. Hasler, P.P. Bosshard, E.D. Cecco, E. Bächli, A. Rudiger,  
381 M. Stüssi-Helbling, L.C. Huber, A.S. Zinkernagel, D.J. Schaer, A. Aguzzi, U. Held, E.  
382 Probst-Müller, S.K. Rampini, and O. Boyman. 2020. Systemic and mucosal antibody  
383 secretion specific to SARS-CoV-2 during mild versus severe COVID-19. *bioRxiv*  
384 2020.2005.2021.108308.

385 Charlson, M.E., P. Pompei, K.L. Ales, and C.R. MacKenzie. 1987. A new method of classifying  
386 prognostic comorbidity in longitudinal studies: development and validation. *J Chronic*  
387 *Dis* 40:373-383.

388 Dan, J.M., J. Mateus, Y. Kato, K.M. Hastie, C.E. Faliti, S.I. Ramirez, A. Frazier, E.D. Yu, A.  
389 Grifoni, S.A. Rawlings, B. Peters, F. Krammer, V. Simon, E.O. Saphire, D.M. Smith, D.  
390 Weiskopf, A. Sette, and S. Crotty. 2020. Immunological memory to SARS-CoV-2  
391 assessed for greater than six months after infection. *bioRxiv* 2020.2011.2015.383323.

392 Falck-Jones, S., S. Vangeti, M. Yu, R. Falck-Jones, A. Cagigi, I. Badolati, B. Osterberg, M.J.  
393 Lautenbach, E. Ahlberg, A. Lin, I. Szurgot, K. Lenart, F. Hellgren, J. Salde, J. Albert, N.  
394 Johansson, M. Bell, K. Lore, A. Farnert, and A. Smed-Sorensen. 2020. Functional  
395 myeloid-derived suppressor cells expand in blood but not airways of COVID-19  
396 patients and predict disease severity. *medRxiv*

397 Gaebler, C., Z. Wang, J.C.C. Lorenzi, F. Muecksch, S. Finkin, M. Tokuyama, M. Ladinsky, A.  
398 Cho, M. Jankovic, D. Schaefer-Babajew, T.Y. Oliveira, M. Cipolla, C. Viant, C.O. Barnes,  
399 A. Hurley, M. Turroja, K. Gordon, K.G. Millard, V. Ramos, F. Schmidt, Y. Weisblum, D.  
400 Jha, M. Tankelevich, J. Yee, I. Shimeliovich, D.F. Robbani, Z. Zhao, A. Gazumyan, T.  
401 Hatzioannou, P.J. Bjorkman, S. Mehandru, P.D. Bieniasz, M. Caskey, and M.C.  
402 Nussenzweig. 2020. Evolution of Antibody Immunity to SARS-CoV-2. *bioRxiv*

403 Grifoni, A., D. Weiskopf, S.I. Ramirez, J. Mateus, J.M. Dan, C.R. Moderbacher, S.A. Rawlings,  
404 A. Sutherland, L. Premkumar, R.S. Jadi, D. Marrama, A.M. de Silva, A. Frazier, A.F.  
405 Carlin, J.A. Greenbaum, B. Peters, F. Krammer, D.M. Smith, S. Crotty, and A. Sette.  
406 2020. Targets of T Cell Responses to SARS-CoV-2 Coronavirus in Humans with COVID-  
407 19 Disease and Unexposed Individuals. *Cell* 181:1489-1501 e1415.

408 Grissom, C.K., S.M. Brown, K.G. Kuttler, J.P. Boltax, J. Jones, A.R. Jephson, and J.F. Orme, Jr.  
409 2010. A modified sequential organ failure assessment score for critical care triage.  
410 *Disaster Med Public Health Prep* 4:277-284.

411 Gudbjartsson, D.F., G.L. Norddahl, P. Melsted, K. Gunnarsdottir, H. Holm, E. Eythorsson, A.O.  
412 Arnthorsson, D. Helgason, K. Bjarnadottir, R.F. Ingvarsson, B. Thorsteinsdottir, S.  
413 Kristjansdottir, K. Birgisdottir, A.M. Kristinsdottir, M.I. Sigurdsson, G.A. Arnadottir,  
414 E.V. Ivarsdottir, M. Andresdottir, F. Jonsson, A.B. Agustsdottir, J. Berglund, B.  
415 Eiriksdottir, R. Fridriksdottir, E.E. Gardarsdottir, M. Gottfredsson, O.S. Gretarsdottir,  
416 S. Gudmundsdottir, K.R. Gudmundsson, T.R. Gunnarsdottir, A. Gylfason, A. Helgason,  
417 B.O. Jensson, A. Jonasdottir, H. Jonsson, T. Kristjansson, K.G. Kristinsson, D.N.  
418 Magnusdottir, O.T. Magnusson, L.B. Olafsdottir, S. Rognvaldsson, L. le Roux, G.

419 Sigmundsdottir, A. Sigurdsson, G. Sveinbjornsson, K.E. Sveinsdottir, M. Sveinsdottir,  
420 E.A. Thorarensen, B. Thorbjornsson, M. Thordardottir, J. Saemundsdottir, S.H.  
421 Kristjansson, K.S. Josefsdottir, G. Masson, G. Georgsson, M. Kristjansson, A. Moller, R.  
422 Palsson, T. Gudnason, U. Thorsteinsdottir, I. Jonsdottir, P. Sulem, and K. Stefansson.  
423 2020. Humoral Immune Response to SARS-CoV-2 in Iceland. *N Engl J Med* 383:1724-  
424 1734.

425 Guthmiller, J.J., O. Stovicek, J. Wang, S. Changrob, L. Li, P. Halfmann, N.Y. Zheng, H. Utset,  
426 C.T. Stamper, H.L. Dugan, W.D. Miller, M. Huang, Y.N. Dai, C.A. Nelson, P.D. Hall, M.  
427 Jansen, K. Shanmugarajah, J.S. Donington, F. Krammer, D. Fremont, A. Joachimiak, Y.  
428 Kawaoka, V. Tesic, M.L. Madariaga, and P.C. Wilson. 2020. SARS-CoV-2 infection  
429 severity is linked to superior humoral immunity against the spike. *bioRxiv*

430 Hansen, C.B., I. Jarlhelt, L. Perez-Alos, L. Hummelshoj Landsy, M. Loftager, A. Rosbjerg, C.  
431 Helgstrand, J.R. Bjelke, T. Egebjerg, J.G. Jardine, C. Svaerke Jorgensen, K. Iversen, R.  
432 Bayarri-Olmos, P. Garred, and M.O. Skjoedt. 2020. SARS-CoV-2 Antibody Responses  
433 Are Correlated to Disease Severity in COVID-19 Convalescent Individuals. *J Immunol*  
434 Intensivvårdsregistret, S. 2018. SIR:s riktlinje för registrering av SOFA. . In.

435 Isho, B., K.T. Abe, M. Zuo, A.J. Jamal, B. Rathod, J.H. Wang, Z. Li, G. Chao, O.L. Rojas, Y.M.  
436 Bang, A. Pu, N. Christie-Holmes, C. Gervais, D. Ceccarelli, P. Samavarchi-Tehrani, F.  
437 Guvenc, P. Budykowski, A. Li, A. Paterson, F.Y. Yue, L.M. Marin, L. Caldwell, J.L. Wrana,  
438 K. Colwill, F. Sicheri, S. Mubareka, S.D. Gray-Owen, S.J. Drews, W.L. Siqueira, M.  
439 Barrios-Rodiles, M. Ostrowski, J.M. Rini, Y. Durocher, A.J. McGeer, J.L. Gommerman,  
440 and A.C. Gingras. 2020. Persistence of serum and saliva antibody responses to SARS-  
441 CoV-2 spike antigens in COVID-19 patients. *Sci Immunol* 5:

442 Juno, J.A., H.X. Tan, W.S. Lee, A. Reynaldi, H.G. Kelly, K. Wragg, R. Esterbauer, H.E. Kent, C.J.  
443 Batten, F.L. Mordant, N.A. Gherardin, P. Pymm, M.H. Dietrich, N.E. Scott, W.H. Tham,  
444 D.I. Godfrey, K. Subbarao, M.P. Davenport, S.J. Kent, and A.K. Wheatley. 2020.  
445 Humoral and circulating follicular helper T cell responses in recovered patients with  
446 COVID-19. *Nat Med*

447 Lynch, K.L., J.D. Whitman, N.P. Lacanienta, E.W. Beckerdite, S.A. Kastner, B.R. Shy, G.M.  
448 Goldgof, A.G. Levine, S.P. Bapat, S.L. Stramer, J.H. Esensten, A.W. Hightower, C. Bern,  
449 and A.H.B. Wu. 2020. Magnitude and kinetics of anti-SARS-CoV-2 antibody responses  
450 and their relationship to disease severity. *Clin Infect Dis*

451 Moghadas, S.M., M.C. Fitzpatrick, P. Sah, A. Pandey, A. Shoukat, B.H. Singer, and A.P.  
452 Galvani. 2020. The implications of silent transmission for the control of COVID-19  
453 outbreaks. *Proc Natl Acad Sci U S A*

454 Piccoli, L., Y.J. Park, M.A. Tortorici, N. Czudnochowski, A.C. Walls, M. Beltramello, C. Silacci-  
455 Fregni, D. Pinto, L.E. Rosen, J.E. Bowen, O.J. Acton, S. Jaconi, B. Guarino, A. Minola, F.  
456 Zatta, N. Sprugasci, J. Bassi, A. Peter, A. De Marco, J.C. Nix, F. Mele, S. Jovic, B.F.  
457 Rodriguez, S.V. Gupta, F. Jin, G. Piumatti, G. Lo Presti, A.F. Pellanda, M. Biggiogero,  
458 M. Tarkowski, M.S. Pizzuto, E. Cameroni, C. Havenar-Daughton, M. Smithey, D. Hong,  
459 V. Lepori, E. Albanese, A. Ceschi, E. Bernasconi, L. Elzi, P. Ferrari, C. Garzoni, A. Riva,  
460 G. Snell, F. Sallusto, K. Fink, H.W. Virgin, A. Lanzavecchia, D. Corti, and D. Veisler.  
461 2020. Mapping Neutralizing and Immunodominant Sites on the SARS-CoV-2 Spike  
462 Receptor-Binding Domain by Structure-Guided High-Resolution Serology. *Cell*

463 Robbiani, D.F., C. Gaebler, F. Muecksch, J.C.C. Lorenzi, Z. Wang, A. Cho, M. Agudelo, C.O.  
464 Barnes, A. Gazumyan, S. Finkin, T. Hagglof, T.Y. Oliveira, C. Viant, A. Hurley, H.H.  
465 Hoffmann, K.G. Millard, R.G. Kost, M. Cipolla, K. Gordon, F. Bianchini, S.T. Chen, V.

- 466 Ramos, R. Patel, J. Dizon, I. Shimeliovich, P. Mendoza, H. Hartweger, L. Nogueira, M.  
467 Pack, J. Horowitz, F. Schmidt, Y. Weisblum, E. Michailidis, A.W. Ashbrook, E. Waltari,  
468 J.E. Pak, K.E. Huey-Tubman, N. Koranda, P.R. Hoffman, A.P. West, Jr., C.M. Rice, T.  
469 Hatzioannou, P.J. Bjorkman, P.D. Bieniasz, M. Caskey, and M.C. Nussenzweig. 2020.  
470 Convergent antibody responses to SARS-CoV-2 in convalescent individuals. *Nature*  
471 Rodda, L.B., J. Netland, L. Shehata, K.B. Pruner, P.M. Morawski, C. Thouvenel, K.K. Takehara,  
472 J. Eggenberger, E.A. Hemann, H.R. Waterman, M.L. Fahning, Y. Chen, J. Rathe, C.  
473 Stokes, S. Wrenn, B. Fiala, L.P. Carter, J.A. Hamerman, N.P. King, M. Gale, D.J.  
474 Campbell, D. Rawlings, and M. Pepper. 2020. Functional SARS-CoV-2-specific immune  
475 memory persists after mild COVID-19. *medRxiv*
- 476 Rydzynski Moderbacher, C., S.I. Ramirez, J.M. Dan, A. Grifoni, K.M. Hastie, D. Weiskopf, S.  
477 Belanger, R.K. Abbott, C. Kim, J. Choi, Y. Kato, E.G. Crotty, C. Kim, S.A. Rawlings, J.  
478 Mateus, L.P.V. Tse, A. Frazier, R. Baric, B. Peters, J. Greenbaum, E. Ollmann Saphire,  
479 D.M. Smith, A. Sette, and S. Crotty. 2020. Antigen-Specific Adaptive Immunity to  
480 SARS-CoV-2 in Acute COVID-19 and Associations with Age and Disease Severity. *Cell*  
481 Song, G., W.T. He, S. Callaghan, F. Anzanello, D. Huang, J. Ricketts, J.L. Torres, N. Beutler, L.  
482 Peng, S. Vargas, J. Cassell, M. Parren, L. Yang, C. Ignacio, D.M. Smith, J.E. Voss, D.  
483 Nemazee, A.B. Ward, T. Rogers, D.R. Burton, and R. Andrabi. 2020. Cross-reactive  
484 serum and memory B cell responses to spike protein in SARS-CoV-2 and endemic  
485 coronavirus infection. *bioRxiv*
- 486 Staines, H.M., D.E. Kirwan, D.J. Clark, E.R. Adams, Y. Augustin, R.L. Byrne, M. Coccozza, A.I.  
487 Cubas-Atienza, L.E. Cuevas, M. Cusinato, B.M.O. Davies, M. Davis, P. Davis, A. Duvoix,  
488 N.M. Eckersley, D. Forton, A. Fraser, G. Garrod, L. Hadcocks, Q. Hu, M. Johnson, G.A.  
489 Kay, K. Klekotko, Z. Lewis, J. Mensah-Kane, S. Menzies, I. Monahan, C. Moore, G.  
490 Nebe-von-Caron, S.I. Owen, C. Sainter, A.A. Sall, J. Schouten, C. Williams, J. Wilkins, K.  
491 Woolston, J.R.A. Fitchett, S. Krishna, and T. Planche. 2020. Dynamics of IgG  
492 seroconversion and pathophysiology of COVID-19 infections. *medRxiv*
- 493 Sterlin, D., A. Mathian, M. Miyara, A. Mohr, F. Anna, L. Claer, P. Quentric, J. Fadlallah, P.  
494 Ghillani, C. Gunn, R. Hockett, S. Mudumba, A. Guihot, C.-E. Luyt, J. Mayaux, A.  
495 Beurton, S. Fourati, J.-M. Lacorte, H. Yssel, C. Parizot, K. Dorgham, P. Charneau, Z.  
496 Amoura, and G. Gorochov. 2020. IgA dominates the early neutralizing antibody  
497 response to SARS-CoV-2. *medRxiv*
- 498 Vincent, J.L., R. Moreno, J. Takala, S. Willatts, A. De Mendonça, H. Bruining, C.K. Reinhart,  
499 P.M. Suter, and L.G. Thijs. 1996. The SOFA (Sepsis-related Organ Failure Assessment)  
500 score to describe organ dysfunction/failure. On behalf of the Working Group on  
501 Sepsis-Related Problems of the European Society of Intensive Care Medicine.  
502 *Intensive Care Med* 22:707-710.
- 503 Walls, A.C., Y.J. Park, M.A. Tortorici, A. Wall, A.T. McGuire, and D. Veasley. 2020. Structure,  
504 Function, and Antigenicity of the SARS-CoV-2 Spike Glycoprotein. *Cell* 181:281-292  
505 e286.
- 506 Wrapp, D., N. Wang, K.S. Corbett, J.A. Goldsmith, C.L. Hsieh, O. Abiona, B.S. Graham, and J.S.  
507 McLellan. 2020. Cryo-EM structure of the 2019-nCoV spike in the prefusion  
508 conformation. *Science* 367:1260-1263.
- 509 Zaki, N., H. Alashwal, and S. Ibrahim. 2020. Association of hypertension, diabetes, stroke,  
510 cancer, kidney disease, and high-cholesterol with COVID-19 disease severity and  
511 fatality: A systematic review. *Diabetes Metab Syndr* 14:1133-1142.

512 Zhao, J., Q. Yuan, H. Wang, W. Liu, X. Liao, Y. Su, X. Wang, J. Yuan, T. Li, J. Li, S. Qian, C. Hong,  
513 F. Wang, Y. Liu, Z. Wang, Q. He, Z. Li, B. He, T. Zhang, Y. Fu, S. Ge, L. Liu, J. Zhang, N.  
514 Xia, and Z. Zhang. 2020. Antibody Responses to SARS-CoV-2 in Patients With Novel  
515 Coronavirus Disease 2019. *Clin Infect Dis* 71:2027-2034.  
516 Zielinski, C.E., D. Corti, F. Mele, D. Pinto, A. Lanzavecchia, and F. Sallusto. 2011. Dissecting  
517 the human immunologic memory for pathogens. *Immunol Rev* 240:40-51.  
518  
519

## 520 Figure legends

521  
522 **Figure 1. Study and sampling overview. A)** Overview of study cohort and controls, timeline  
523 of longitudinal sampling, the anatomical compartments analyzed, and the measurements  
524 performed. AS=asymptomatic. **(B)** Patient sampling overview with first study sample (color)  
525 and first convalescent sample (open) indicated for each patient, hospital  
526 admission/discharge, level of care and outcome. Patients are group based on peak disease  
527 severity (PDS); mild (PDS 1 and 2), moderate (PDS 3 and 4), severe (PDS 5 and 6) and fatal  
528 (PDS 7). Individual inclusion sample for each patient is color-coded based on disease severity  
529 at the time of sampling.  
530

531 **Figure 2. Plasma IgG and IgA responses to N, S and RBD across COVID-19 severity during**  
532 **acute disease and convalescence. A)** Individual levels of plasma IgG and IgA (from left to  
533 right) in SARS-CoV-2 infected individuals with different peak disease severity (PDS). Data in  
534 cyan and green refer to mild disease (PDS 1 and 2), yellow and orange refer to moderate  
535 disease (PDS 3 and 4), red and cayenne refer to severe disease (PDS 5 and 6) and grey refers  
536 to patients with fatal outcome (PDS 7). Black lines indicate medians and dotted lines indicate  
537 the average background level from pre-pandemic healthy controls. Mann-Whitney U was  
538 used to compare the groups and considered statistically significant at  $p < 0.05$ . \*\*  $p < 0.01$ , \*\*\*  
539  $p < 0.001$ , \*\*\*\*  $p < 0.0001$ . **B)** Spearman correlation for plasma IgG (top) and IgA (bottom)  
540 against the RBD versus days from onset of symptoms during the acute and the convalescent  
541 phases are shown. Circles with black lining refer to convalescent samples. **C-D)** Longitudinal  
542 measurements of plasma IgG against RBD on a subset of patients with moderate/severe  
543 disease and fatal outcome who had low ( $< 1.0$  OD) antibody titers at the time of study  
544 inclusion and were longitudinal samples from symptomatic (acute) disease were available.  
545 Levels are shown at the time of study inclusion, during the late acute phase and at  
546 convalescence, and shown with respect to days from onset of symptoms and as a group  
547 comparison. The black lines connect data points from the same individuals. Wilcoxon test  
548 was used to compare the groups separately and considered statistically significant at  $p < 0.05$ .  
549 \*\*\*\*  $p < 0.0001$ .  
550

551 **Figure 3. Airway IgG and IgA responses to RBD across COVID-19 severity during acute**  
552 **disease and convalescence. A)** Levels of IgG and IgA to RBD in nostrils swabs (NSW) and  
553 nasopharyngeal aspirates (NPA). The black lines indicate median values. Mann-Whitney U  
554 was used to compare the group and considered statistically significant at  $p < 0.05$ . \* $p < 0.05$  \*\*  
555  $p < 0.01$ , \*\*\*  $p < 0.001$ , \*\*\*\*  $p < 0.0001$ . **B)** Heat map generated grouping patients according to  
556 PDS showing acute and convalescent IgG and IgA titers against N, S and RBD (plasma) and  
557 RBC (NSW, NPA and ETA) for each patient. The heat map also includes data from PPHC and  
558 PCR-individuals (indicated with PDS 0). Missing data and not available samples are shown in

559 black. **C)** Spearman correlation for NPA versus plasma immunoglobulins against the RBD  
560 during acute disease. In A) the line overlaps with not detected (ND) for IgG levels. **D)**  
561 Comparison of the levels of RBD IgG/A in patient-matched NSW, NPA, endotracheal  
562 aspirates (ETA) and plasma collected at the same time point. The black lines connect data  
563 points from the same individuals. Wilcoxon test was used to compare the groups separately  
564 and considered statistically significant at  $p < 0.05$ . \*\*\*\*  $p < 0.0001$ .

565  
566 **Figure 4. Assessment of frequencies of B cells in the respiratory tract and of circulating S-**  
567 **specific memory B cells. A)** Representative example with gating strategy for the  
568 identification of lymphocytes (identified as negative for CD14/16/123/66) and of total B cells  
569 (CD3-CD19+) in respiratory NPA and ETA samples. **B)** Levels of lymphocytes and of total B  
570 cells in NPA and ETA in a subset of patients alongside with NPA from healthy controls. Mann-  
571 Whitney test was used to compare the groups and considered statistically significant at  
572  $p < 0.05$ . \*\*  $p < 0.01$ .

573 **C)** Representative examples with gating strategy of SARS-Cov-2 S-specific memory B cells  
574 from one pre-pandemic healthy control, convalescent samples from one SARS-CoV-2 PCR-  
575 individual and one mild and one moderate/severe COVID-19 patient. Further  
576 characterization of S-positive memory B cells on RBD binding and B cell isotype (IgG+ or IgA+  
577 assumed to correspond to IgD-IgM-IgG- B cells). **D)** Pie charts show the cumulative  
578 proportion of RBD binding and memory B cell isotypes in convalescent samples from mild  
579 (n=6) and moderate/severe (n=8) COVID-19 patients. **E)** Frequencies of S-specific memory B  
580 cells in matched acute (filled) and convalescent (filled with black lining) PBMCs in relation to  
581 days in the subset of individuals analyzed color-coded according to PDS. Dotted lines on  
582 indicate the average background staining from PCR- and PPHC. **F)** Levels of circulating Spike+  
583 switched memory B cells during acute disease and convalesce in the subset of patients  
584 analyzed, as well as PPHC, color-coded according to PDS. Circles with black lining refer to  
585 data during the convalescent phase. Black triangles symbolize the PPHC. Differences were  
586 assessed using Kruskal -Wallis with Dunn's multiple comparisons test and considered  
587 statistically significant at  $p < 0.05$ . \*\*  $p < 0.01$ .

588

589 **Table 1.** Clinical characterization of the SARS-CoV-2 infected cohort.

590

**A**

Study cohort (n=147)

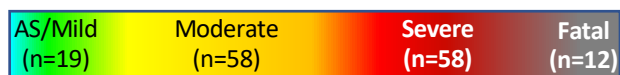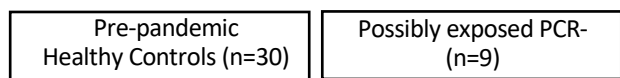

Timeline

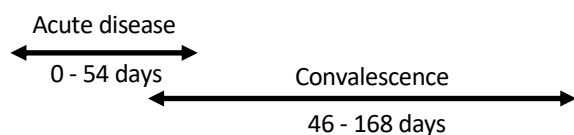

Sampling

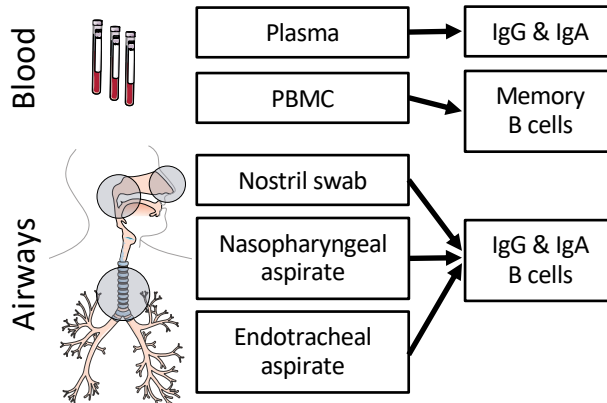

**B**

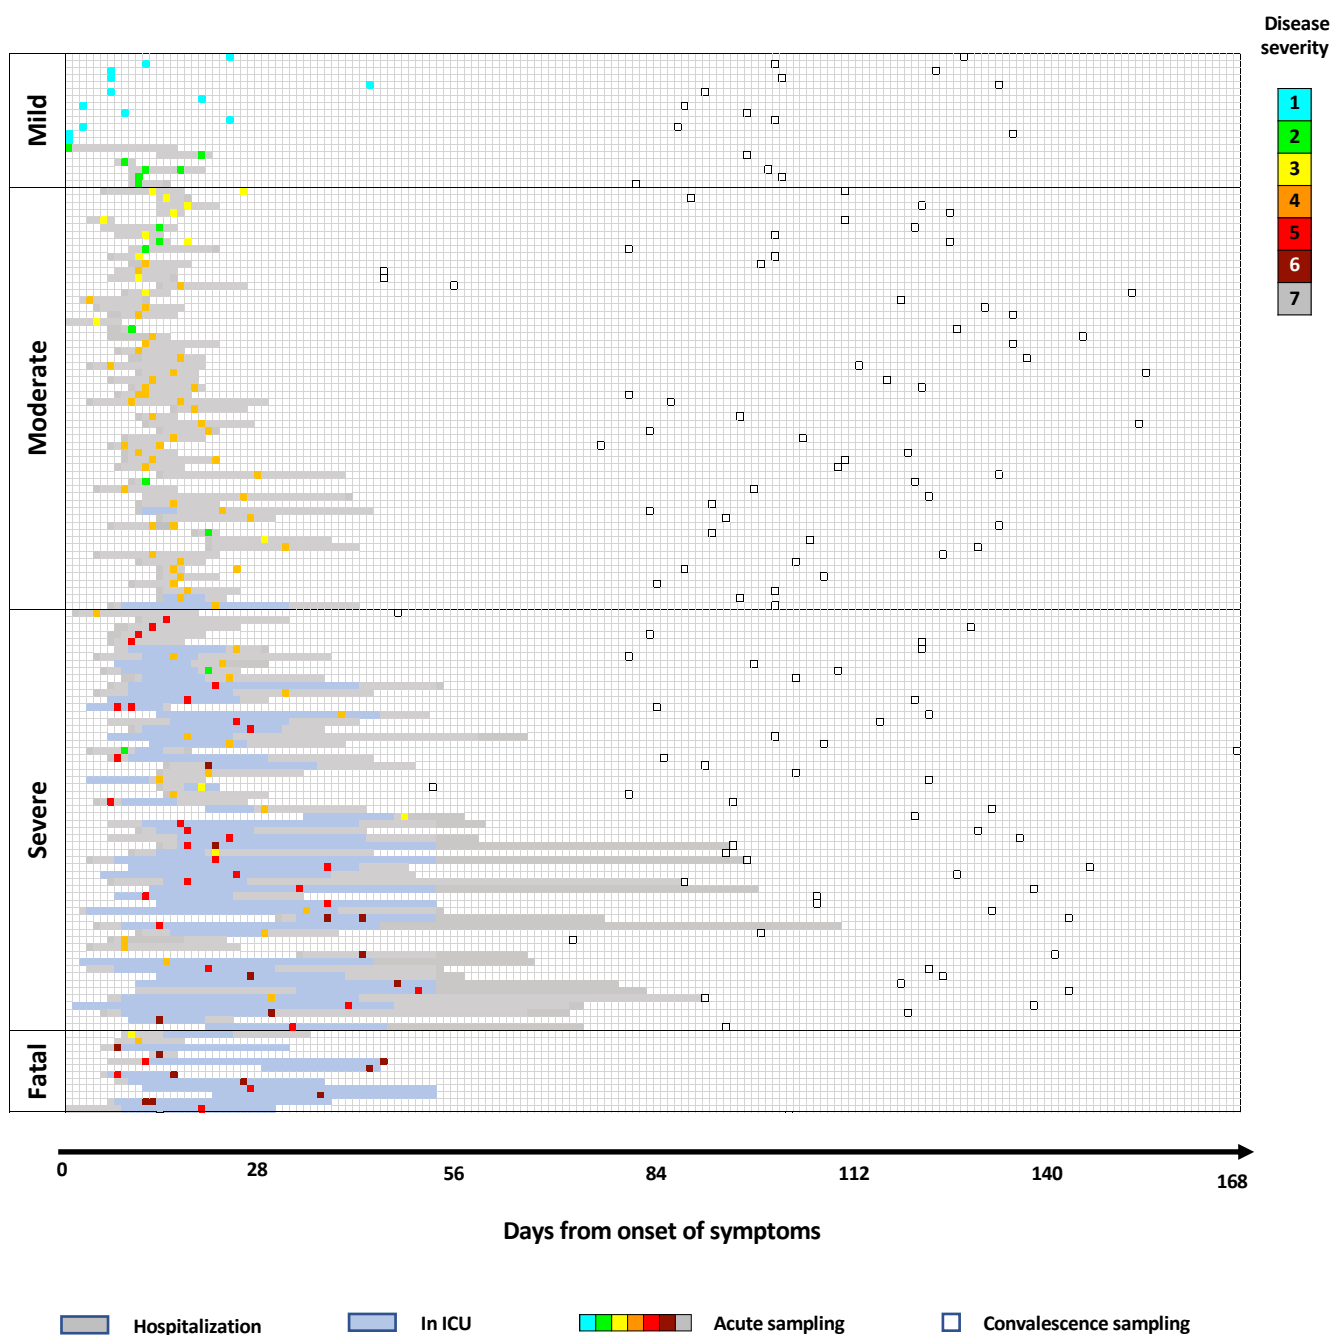

Figure 1

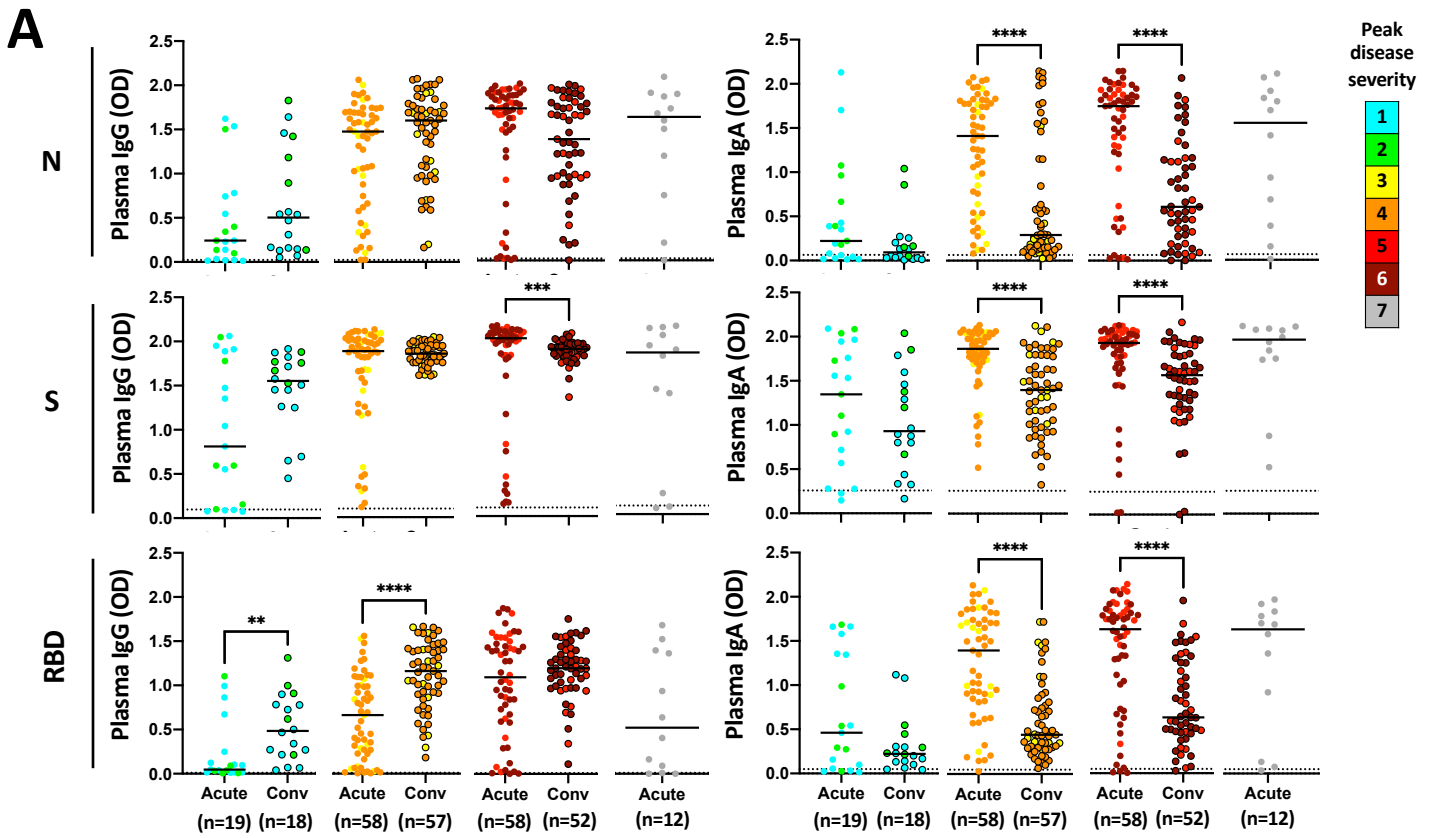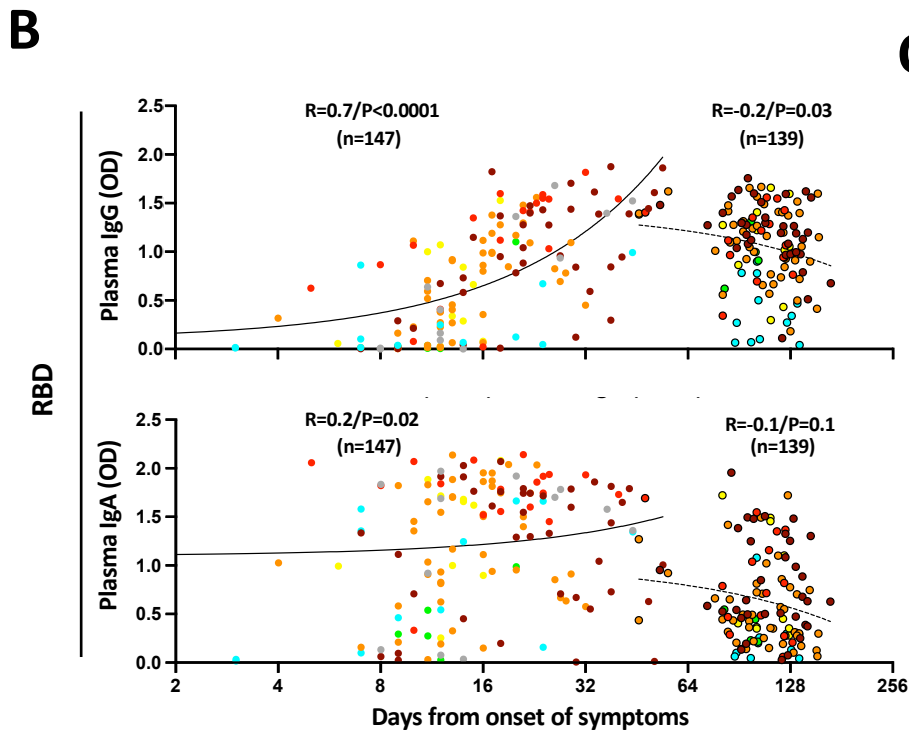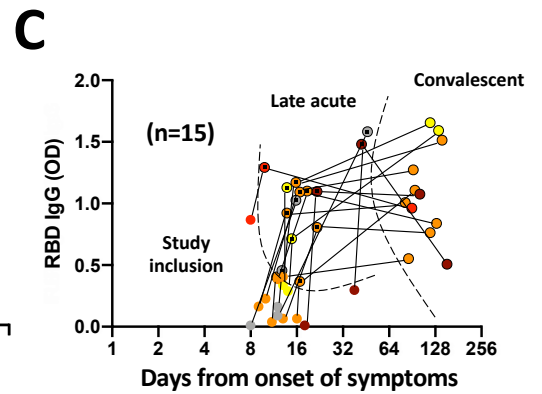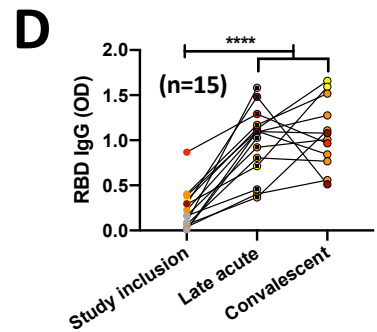

Figure 2



**A**

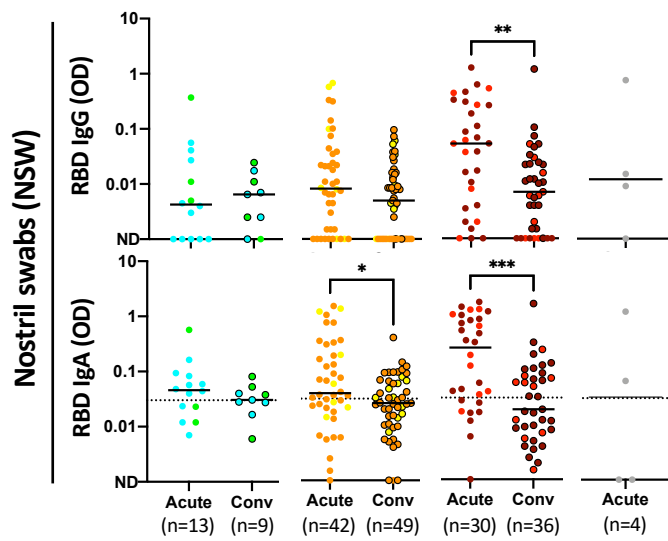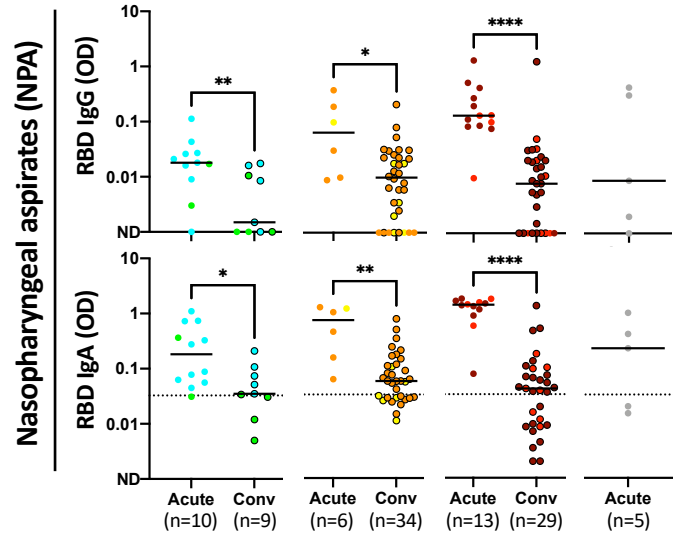

**B**

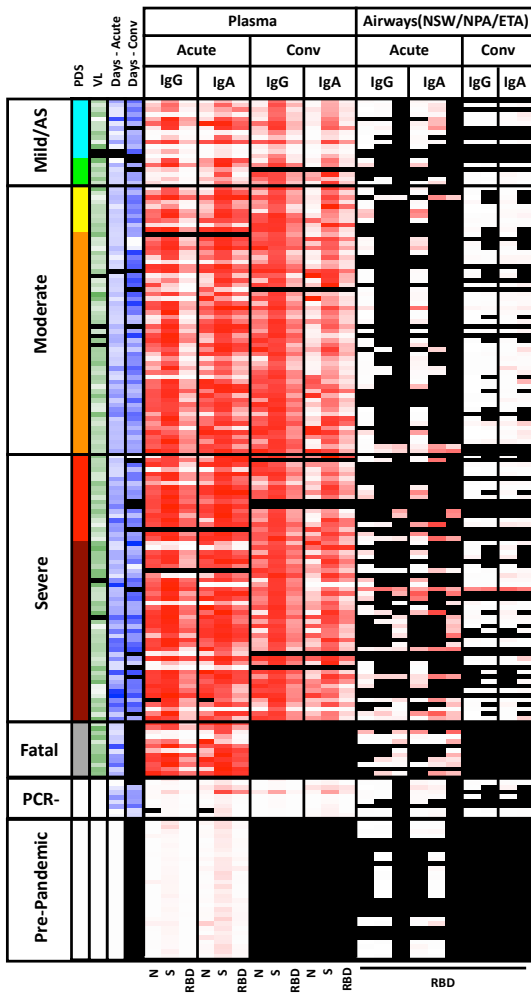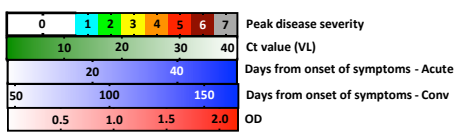

**C**

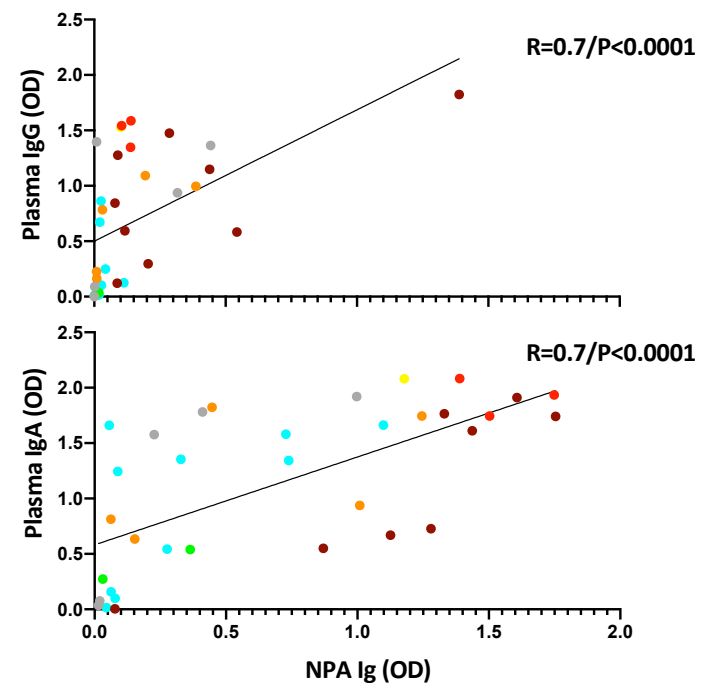

**D**

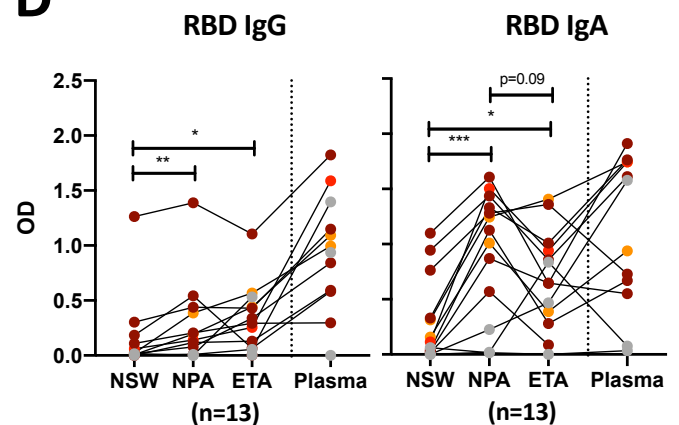

Figure 3

**A**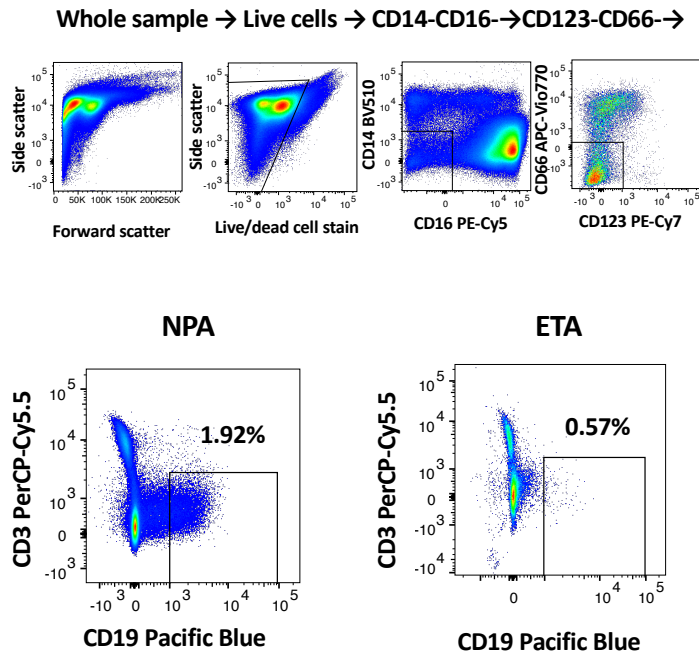**B**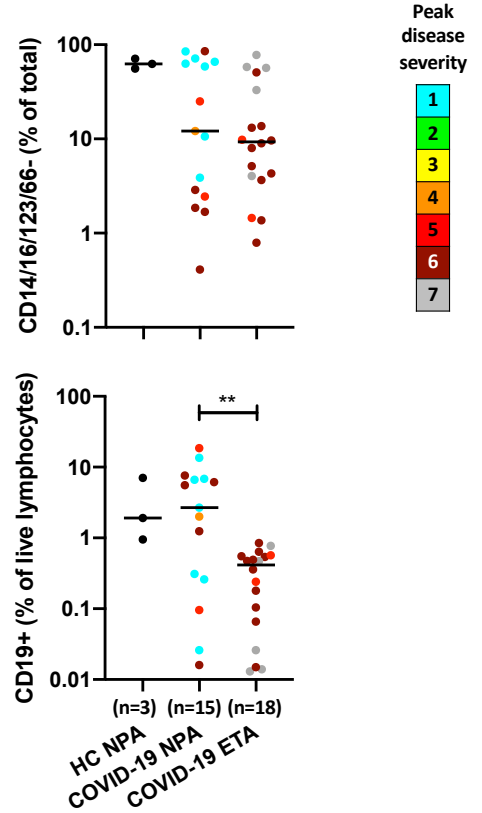**C**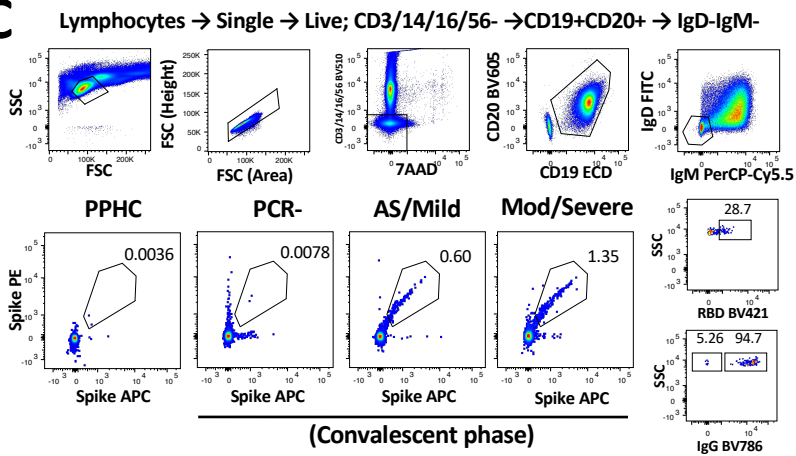**D**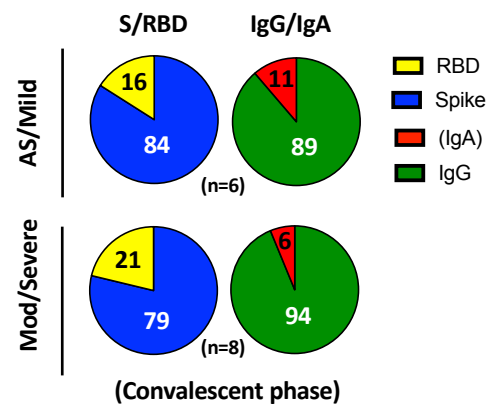**E**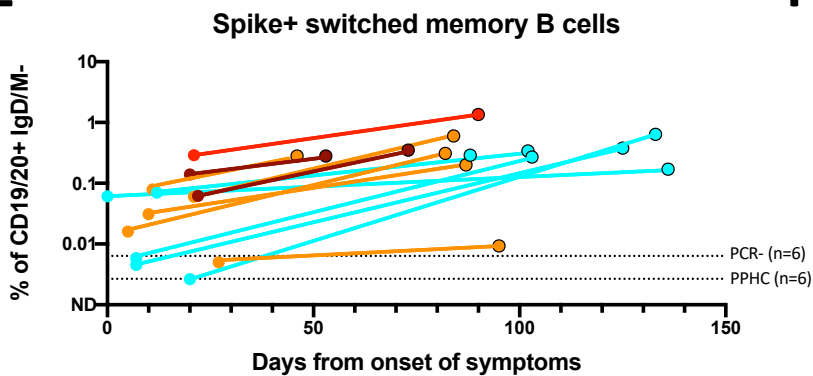**F**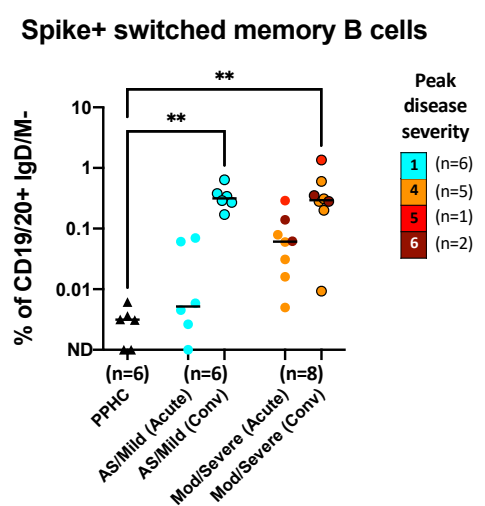

Figure 4

**Table 1.** Clinical characterization of the SARS-CoV-2 infected cohort.

| Disease severity<br>PDS                                        | Mild                |                      | Moderate            |                     | Severe              |                     | Fatal           |
|----------------------------------------------------------------|---------------------|----------------------|---------------------|---------------------|---------------------|---------------------|-----------------|
|                                                                | 1                   | 2                    | 3                   | 4                   | 5*                  | 6*                  | 7               |
| Resp. SOFA score                                               | 0                   | 0                    | 1                   | 2                   | 3                   | 4                   |                 |
| Admitted (Y/N)                                                 | N                   | Y                    | Y                   | Y                   | Y                   | Y                   | Y               |
| PFI (kPa)                                                      | > 53                | > 53                 | < 53                | < 40                | < 27                | < 13                | -               |
| SFI                                                            | > 400               | > 400                | ≤ 400               | ≤ 315               | ≤ 235               | < 150               |                 |
| Number of individuals<br>(%)                                   | 13<br>(8.8)         | 6<br>(4.1)           | 10<br>(6.8)         | 48<br>(33)          | 19<br>(13)          | 39<br>(27)          | 12<br>(8.2)     |
| Age, mean<br>(Range)                                           | 44<br>(24-72)       | 60<br>(41-72)        | 56<br>(46-78)       | 55<br>(24-76)       | 57<br>(42-74)       | 61<br>(25-77)       | 66<br>(52-78)   |
| Male<br>(%)                                                    | 5<br>(38)           | 2<br>(33)            | 6<br>(60)           | 38<br>(79)          | 15<br>(79)          | 34<br>(87)          | 9<br>(75)       |
| Days from symptoms<br>to admission – median<br>(Range)         | -                   | 10<br>(0-14)         | 8.5<br>(4-14)       | 10<br>(3-21)        | 7<br>(2-14)         | 10<br>(2-35)        | 7<br>(1-28)     |
| Days from symptoms<br>to inclusion “Acute” –<br>median (Range) | 9<br>(3-44)         | 11<br>(0-20)         | 13.5<br>(6-18)      | 13<br>(4-32)        | 21<br>(5-40)        | 22<br>(7-54)        | 13<br>(8-44)    |
| Days from symptoms<br>to follow-up “Conv” –<br>median (Range)  | 102<br>(88-<br>136) | 99,5<br>(82-<br>103) | 112<br>(81-<br>127) | 109<br>(46-<br>155) | 109<br>(48-<br>130) | 120<br>(53-<br>168) | -               |
| VL (Ct value) median<br>(Range)                                | 27.5<br>(40-14)     | 25.0<br>(29-14)      | 26.7<br>(36-15)     | 26.8<br>(36-12)     | 25.8<br>(36-19)     | 24.0<br>(37-14)     | 20.5<br>(32-13) |
| CCI, mean<br>(SD)                                              | 1<br>(2)            | 2<br>(1)             | 1<br>(1)            | 2<br>(2)            | 2<br>(1)            | 2<br>(1)            | 3<br>(1)        |
| BMI, mean<br>(SD)                                              | 24.1<br>(4.5)       | 25.1<br>(2.2)        | 26.0<br>(3.2)       | 30.3<br>(4.2)       | 29.2<br>(5.3)       | 28.6<br>(4.7)       | 28.6<br>(2.4)   |
| Hypertension<br>(%)                                            | 1<br>(8.3)          | 0<br>(0)             | 2<br>(20)           | 20<br>(42)          | 8<br>(42)           | 15<br>(38)          | 9<br>(75)       |
| Diabetes<br>(%)                                                | 2<br>(17)           | 0<br>(0)             | 1<br>(10)           | 14<br>(29)          | 5<br>(26)           | 9<br>(23)           | 3<br>(25)       |
| Current smokers<br>(%)                                         | 0<br>(0)            | 0<br>(0)             | 2<br>(20)           | 5<br>(11)           | 1<br>(5.3)          | 2<br>(5.3)          | 0<br>(0)        |
| ACE-I<br>(%)                                                   | 0<br>(0)            | 0<br>(0)             | 0<br>(0)            | 5<br>(10)           | 1<br>(5.3)          | 4<br>(10)           | 1<br>(9.1)      |
| IS drugs<br>(%)                                                | 1<br>(7.7)          | 0<br>(0)             | 0<br>(0)            | 4<br>(8.3)          | 2<br>(11)           | 5<br>(13)           | 1<br>(8.3)      |

PDS: Peak Disease Severity

SOFA: Sequential Organ Failure Assessment

PFI: PaO<sub>2</sub>/FiO<sub>2</sub>-index

SFI: SpO<sub>2</sub>/FiO<sub>2</sub>-index

VL: Viral Load

CCI: Charlson comorbidity index

BMI: body mass index

ACE-I: angiotensin converting enzyme-inhibitors

IS: immunosuppressive

\*Requires mechanical ventilation
