1 **Airway antibodies emerge according to COVID-19 severity and wane rapidly but**  
2 **reappear after SARS-CoV-2 vaccination**

3  
4 Alberto Cagigi<sup>1</sup>, Meng Yu<sup>1</sup>, Björn Österberg<sup>1</sup>, Julia Svensson<sup>1</sup>, Sara Falck-Jones<sup>1</sup>, Sindhu  
5 Vangeti<sup>1</sup>, Eric Åhlberg<sup>1</sup>, Lida Azizmohammadi<sup>1</sup>, Anna Warnqvist<sup>2</sup>, Ryan Falck-Jones<sup>3,4</sup>, Pia C  
6 Gubisch<sup>1</sup>, Mert Ödemis<sup>1</sup>, Farangies Ghafoor<sup>1</sup>, Mona Eisele<sup>1</sup>, Klara Lenart<sup>1</sup>, Max Bell<sup>3,4</sup>, Niclas  
7 Johansson<sup>5,6</sup>, Jan Albert<sup>7,8</sup>, Jörgen Sälde<sup>9</sup>, Deleah Pettie<sup>10,11</sup>, Michael Murphy<sup>10,11</sup>, Lauren  
8 Carter<sup>10,11</sup>, Neil P King<sup>10,11</sup>, Sebastian Ols<sup>1</sup>, Johan Normark<sup>12</sup>, Clas Ahlm<sup>12</sup>, Mattias Forsell<sup>12</sup>,  
9 Anna Färnert<sup>5,6</sup>, Karin Loré<sup>1\*</sup> and Anna Smed-Sörensen<sup>1\*</sup>

10  
11 <sup>1</sup>Division of Immunology and Allergy, Department of Medicine Solna, Karolinska Institutet, Karolinska  
12 University Hospital, Stockholm, Sweden. <sup>2</sup>Division of Biostatistics, Institute of Environmental Medicine,  
13 Karolinska Institutet, Stockholm, Sweden. <sup>3</sup>Department of Physiology and Pharmacology, Karolinska  
14 Institutet, Stockholm, Sweden. <sup>4</sup>Department of Perioperative Medicine and Intensive Care, Karolinska  
15 University Hospital, Stockholm, Sweden. <sup>5</sup>Division of Infectious Diseases, Department of Medicine Solna,  
16 Center for Molecular Medicine, Karolinska Institutet, Sweden. <sup>6</sup>Department of Infectious Diseases,  
17 Karolinska University Hospital Solna, Stockholm, Sweden. <sup>7</sup>Department of Microbiology, Tumor and Cell  
18 Biology, Karolinska Institutet, Stockholm, Sweden. <sup>8</sup>Clinical Microbiology, Karolinska University Hospital  
19 Solna, Stockholm, Sweden. <sup>9</sup>Närakut SLSO, Karolinska University Hospital Solna, Stockholm, Sweden.  
20 <sup>10</sup>Department of Biochemistry, University of Washington, Seattle, WA, United States. <sup>11</sup>Institute for Protein  
21 Design, University of Washington, Seattle, WA, United States. <sup>12</sup>Section of Infection and Immunology,  
22 Department of Clinical Microbiology, Umeå university, Umeå, Sweden. \*Equal contribution.

23  
24 **Correspondence to:** Karin Loré and Anna Smed-Sörensen, Division of Immunology and  
25 Allergy, Department of Medicine Solna, Karolinska Institutet, Visionsgatan 4, BioClinicum  
26 J7:30, Karolinska University Hospital, 171 64 Stockholm, Sweden.

27 E-mail addresses: [karin.lore@ki.se](mailto:karin.lore@ki.se); [anna.smed.sorensen@ki.se](mailto:anna.smed.sorensen@ki.se)

28

29 **Conflict of interest statement**

30 **NOTE:** This preprint reports new research that has not been certified by peer review and should not be used to guide clinical practice.  
The authors have declared that no conflict of interest exists.

31 **Abstract**

32 Understanding the presence and durability of antibodies against SARS-CoV-2 in the airways  
33 is required to provide insights on the ability of individuals to neutralize the virus locally and  
34 prevent viral spread. Here, we longitudinally assessed both systemic and airway immune  
35 responses upon SARS-CoV-2 infection in a clinically well-characterized cohort of 147 infected  
36 individuals representing the full spectrum of COVID-19 severity; from asymptomatic  
37 infection to fatal disease. In addition, we evaluated how SARS-CoV-2 vaccination influenced  
38 the antibody responses in a subset of these individuals during convalescence as compared to  
39 naïve individuals. Not only systemic but also airway antibody responses correlated with the  
40 degree of COVID-19 disease severity. However, while systemic IgG levels were durable for up  
41 to 8 months, airway IgG and IgA had declined significantly within 3 months. After  
42 vaccination, there was an increase in both systemic and airway antibodies, in particular IgG,  
43 often exceeding the levels found during acute disease. In contrast, naïve individuals showed  
44 low airway antibodies after vaccination. In the former COVID-19 patients, airway antibody  
45 levels were significantly elevated after the boost vaccination, highlighting the importance of  
46 prime and boost vaccination also for previously infected individuals to obtain optimal  
47 mucosal protection.

48

49

50 **Introduction**

51 Severe acute respiratory syndrome coronavirus 2 (SARS-CoV-2) infection that causes  
52 coronavirus disease 2019 (COVID-19) presents with a wide range of disease severity from  
53 asymptomatic to fatal (1, 2). Individuals of advanced age and/or those with comorbidities  
54 are overrepresented among patients who develop severe disease (3). However, the majority  
55 of SARS-CoV-2 infected individuals experience asymptomatic infection or only mild disease  
56 (4).

57

58 Systemic antibodies against the SARS-CoV-2 nucleocapsid (N) and the viral surface  
59 glycoprotein spike (S) as well as against the receptor binding domain (RBD) (5, 6) of the S  
60 protein have been studied extensively (7-11). Responses against the internal N protein are  
61 often readily detectable but their contribution to protection and control of disease is not  
62 clear (8, 10). In contrast, antibody responses against S and, in particular, against the RBD  
63 result in virus neutralization (12). Responses against the RBD are thus likely necessary for  
64 protection from re-infection or prevention of symptomatic disease. However, the presence  
65 and durability of antibodies during COVID-19 in the airways is still not well understood.

66 The respiratory tract is the initial site of viral infection and replication. The availability  
67 of antibodies at this site could therefore determine the ability to neutralize the virus locally  
68 in case of (re-) exposure and prevent viral spread. Generally, antibodies present in the  
69 circulation and at local sites are the result of secretion from short-lived plasmablasts and/or  
70 terminally differentiated plasma cells in the bone marrow or mucosal sites (13). However,  
71 the response to a secondary infection once antibody titers have waned below protective  
72 levels mostly relies on the presence of resting antigen-specific memory B cells that are  
73 rapidly activated upon antigen re-exposure (13). Whether vaccination against SARS-CoV-2

74 also elicits systemic antibody responses in addition to local antibodies in the airways of  
75 individuals who recovered from COVID-19, and via which mechanism, is currently unknown.

76 In this study we present data from a cohort of patients that we have followed since  
77 mid-March 2020, which was the start of the pandemic in Sweden. We show longitudinal  
78 data on virus-specific systemic and airway antibody and B cell memory responses generated  
79 in this clinically well-characterized cohort of individuals with SARS-CoV-2 infection (n=147)  
80 ranging from asymptomatic SARS-CoV-2 infection to fatal COVID-19 disease. In addition, we  
81 show how subsequent SARS-CoV-2 vaccination during the convalescent phase significantly  
82 boosts not only the systemic but also airway antibody responses.

83

## 84 **Results**

### 85 **Patient enrollment, assessment of disease severity and timeline**

86 Individuals were sampled longitudinally in blood and airways during acute  
87 infection/symptomatic disease and during convalescence (median 3 and 8 months from  
88 symptom onset). Donor-matched plasma, peripheral blood mononuclear cells (PBMC),  
89 nostril swabs (NSW) and nasopharyngeal aspirates (NPA) were collected from all patients  
90 across disease severities whereas endotracheal aspirates (ETA) were only collected from  
91 intubated patients receiving intensive care (Figure 1). Disease severity was assessed daily,  
92 using a seven-point scale derived from the respiratory domain of the sequential organ failure  
93 assessment (SOFA) score (14, 15), with additional levels for non-admitted and fatal cases  
94 (Table 1). Patients were grouped based on peak disease severity, which may differ from  
95 disease severity at time of sampling (Table 1 and Figure 1B). In addition, pre-pandemic  
96 healthy controls (PPHC) (n=30) as well as individuals with influenza-like symptoms, and  
97 possible SARS-CoV-2 exposure, but with negative diagnostic PCR results (PCR-) (n=9) were

98 sampled in the same way and included as controls. Generally, severe patients were sampled  
99 later after symptom onset as compared with individuals with mild disease resulting in a large  
100 time frame of study inclusion with respect to symptom onset (Table 1 and Figure 1B) (16).  
101 For simplicity, the sampling period/study inclusion during ongoing infection and  
102 hospitalization (for those hospitalized) is referred to as the “acute” phase. Samples collected  
103 at the first follow-up visit during convalescence (range 46-168 days from symptom onset;  
104 median 108 days, coefficient of variation 21.56%) are referred to as the “3 months”  
105 timepoint whereas those collected at the second follow-up visit (range 187-344 days;  
106 median 245 days, coefficient of variation 9.52%) are referred to as the “8 months”  
107 timepoint. Time of the first convalescent follow-up sampling from acute sampling ranged 33-  
108 159 days; median 90 days, coefficient of variation 24.84% (Table 1).

109

#### 110 **Plasma IgG and IgA responses to N, S and RBD across COVID-19 severity during acute** 111 **disease and after recovery**

112 We first assessed systemic IgG and IgA responses against N, S and RBD at the time of study  
113 inclusion that ranged between 0-54 days from onset of symptoms; median 16 days for the  
114 whole cohort (Table 1). Both IgG and IgA levels against all viral proteins followed the degree  
115 of disease severity with increasing levels in patients with mild, moderate and severe disease  
116 respectively (Figure 2A). In line with previous reports, IgG against N were the most elevated  
117 in patients who had severe disease or a fatal outcome (8, 10). The degree of disease severity  
118 also associated with the levels of systemic inflammation as indicated by the levels of C-  
119 reactive protein (CRP) in blood and by the neutrophil-lymphocyte ratio (NLR) (Figure 2B).  
120 Interestingly, the levels of neutrophils also specifically associated with disease severity  
121 (Figure 2D) and with all of the systemic antibody responses during acute disease (Figure 2D)

122 and Supplementary figure 1). The levels of IgG during acute disease, and to a lower extent  
123 IgA, against all tested antigens, exhibited a positive correlation with the days from onset of  
124 symptoms (Supplementary figure 2A). This difference in antibody titers over time might be  
125 slightly accentuated by the fact that in our cohort the patients with moderate/severe  
126 disease, and even fatal outcome, for whom we initially observed low IgG titers against RBD,  
127 had an early study inclusion (on average 13 days from onset of symptoms). In fact, these  
128 patients showed significantly higher titers later during the acute phase (on average 19 days)  
129 (Supplementary figure 2B-C). Nonetheless, patients with mild disease displayed lower levels  
130 of plasma IgG against RBD as compared with more severe patients, also when samples were  
131 taken after similar duration of symptoms (Supplementary figure 2D). After 3 months from  
132 symptom onset, the IgG levels remained high in the plasma of patients recovering from  
133 moderate and severe disease, while the levels had further increased in the individuals who  
134 had a mild disease (Figure 3A). However, despite this increase over time, the antibody levels  
135 in mild patients never reached the levels observed for moderate and severe patients or for  
136 those who had a fatal outcome (Figure 3 and Supplementary figure 3A).

137 The IgG levels had significantly waned from 3 to 8 months in patients who recovered from  
138 moderate and severe disease, but the decline was smaller in patients who experienced a  
139 mild disease (Figure 3B, Supplementary figure 3 and Supplementary table 1). In contrast to  
140 IgG, IgA levels from the acute phase, against all antigens, waned substantially in most  
141 patients already after 3 months (Figure 3, Supplementary figure 3 and Supplementary table  
142 1). Antibody titers during acute disease correlated with peak disease severity as well as with  
143 disease severity at time of sampling (Supplementary figure 4). The correlation between  
144 antibody titers and peak disease severity was maintained also when analyzing the antibodies  
145 at the 3- and 8-month follow-up visits (Supplementary figure 4) as also observed in another

146 study (17). Two multivariable linear regression models were also used to estimate the effect  
147 of disease severity, days from onset of symptoms, age, gender and CCI on the different  
148 plasma antibody levels during the acute phase. One unadjusted model and one model  
149 adjusted for these parameters were used (Supplementary table 2). The results from these  
150 analyses confirmed the relation between antibody titers and severity as well as the relation  
151 between antibodies and days from onset of symptoms (Supplementary table 2).

152

### 153 **Airway IgG and IgA responses and assessment of B cell frequencies in the respiratory tract**

154 We next measured the levels of IgG and IgA in the upper and lower airways and compared  
155 with levels in plasma at matched time points. Due to limited respiratory sample volumes, we  
156 focused our analyses on IgG and IgA responses against the RBD since these responses are  
157 most critical for virus neutralization. We found that RBD-specific antibodies could be  
158 detected in nasal swabs (NSW) (Figure 4A) and nasopharyngeal aspirates (NPA) (Figure 4B)  
159 during the acute phase across all disease severities (Figure 4A, B and C). In agreement with  
160 our observations in plasma, antibody levels in the upper respiratory tract were higher in  
161 patients with moderate or severe disease as compared with individuals with mild disease.  
162 Both IgG and IgA levels had declined significantly already after 3 months, with IgG declining  
163 to almost undetectable levels (Figure 4A- C). RBD antibody levels during acute infection were  
164 on average higher in NPA compared to NSW for both IgG and IgA across disease severity  
165 (Figure 4A- C) suggesting that antibody titers may increase not only with disease severity but  
166 also with sampling at different depths of the upper airways. To address this, we compared  
167 the antibody content between donor-matched NSW (peripheral nostril), NPA (upper airway)  
168 and ETA (trachea) collected at the same time point during acute disease from intubated  
169 patients from whom we had both peripheral, upper and lower airway samples. Interestingly,

170 we still found significantly higher levels of IgA against the RBD in NPA as compared with NSW  
171 and ETA (Figure 4D). Furthermore, nasopharyngeal antibody levels (both IgG and IgA)  
172 showed a strong correlation with plasma antibody responses (Figure 4E). We also assessed  
173 the presence of B cells in the respiratory tract of COVID-19 patients by analyzing the  
174 lymphocytes that could be retrieved from NPA and ETA as compared with NPA from three  
175 healthy controls (HC). Despite generally obtaining a significantly lower cell yield from NPA as  
176 compared with ETA, lymphocyte frequencies did not differ in NPA and ETA from COVID-19  
177 patients but both were lower as compared with NPA from HC. Instead, the proportion of B  
178 cells in NPA was higher as compared with ETA in COVID-19 patients and similar to NPA from  
179 HC (Figure 5A-B).

180

### 181 **Expansion of SARS-CoV-2-specific memory B cells**

182 As mentioned above, the virus-specific B cell memory pool will be essential to remount a  
183 rapid antibody response in the case of re-exposure. To assess the establishment of antigen-  
184 specific memory B cells, donor-matched PBMC from acute disease and convalescence were  
185 analyzed side-by-side using fluorescently labelled S and RBD probes (18-20). Patients with  
186 moderate/severe disease showed the presence of Ig-switched memory B cells specific to S in  
187 the acute phase and the memory B cell pool had further expanded after 3 months (ranging  
188 from 0.009 to 1.35%; mean 0.42% during convalescence) (Figure 5C-F). Individuals with mild  
189 disease showed lower frequencies of S-specific memory B cells during acute disease than the  
190 patients with moderate/severe disease. In fact, the frequencies of S-specific memory B cells  
191 in the mild patients during the acute phase were not different from those observed in the  
192 PCR- individuals or in the PPHC (Figure 5C and E). However, the frequencies of S-specific  
193 memory B cells had substantially increased in the mild patients after 3 months (ranging from



194 0.17% to 0.64%; mean 0.35% during convalescence) and were comparable to frequencies  
195 among severe patients. In addition, the levels were well maintained between 3 and 8  
196 months in all groups (Figure 5E and F). Further phenotyping of the S-specific memory B cells  
197 indicated that the majority of these cells may be specific for epitopes on S outside of the  
198 RBD (Figure 5D). S-specific memory B cells in the circulation were predominantly IgG+, rather  
199 than IgA+ (Figure 5D).

200

### 201 **The effect of vaccination on systemic and airway antibody levels**

202 We finally evaluated the influence of SARS-CoV-2 vaccination on the systemic and airway  
203 antibody responses (Figure 6A). A subset of 20 individuals, 3 that recovered from mild, 9  
204 from moderate and 8 from severe COVID-19 one year earlier, were sampled after receiving  
205 their scheduled vaccination (range 270-407 days; median 339 days from symptom onset)  
206 (Table 2). Donor-matched plasma, NSW and NPA were collected at different timepoints after  
207 prime (7-16 days) from 18 patients and after boost (7-28 days) from 19 patients alongside  
208 with samples from 12 individuals naïve to SARS-CoV-2 (7-10 days after prime and boost  
209 vaccinations) to be included as a reference control. All samples were analyzed for the  
210 presence of IgG and IgA against RBD. Antibodies against N were also measured in patient  
211 plasma as a negative control as the vaccines used were based on the S protein. After  
212 vaccination, all individuals demonstrated a significant increase of both plasma IgG and IgA  
213 against the RBD (Figure 6B) but, as expected, not against N (Figure 6B). While the IgG levels  
214 to RBD after boost vaccination exceeded the levels detected during the acute phase, the IgA  
215 levels were equally high (Figure 6B). On the contrary, individuals naïve to SARS-CoV-2 only  
216 had a moderate increase of IgA as compared with IgG after boost (Figure 6B). IgG levels after  
217 boost were significantly lower in individuals naïve to SARS-CoV-2 as compared with those

218 from COVID-19 patients after boost (Figure 6C and Supplementary figure 5A). The airway IgG  
219 levels to RBD also showed a noticeable increase after the boost vaccination in particular. In  
220 fact, the IgG levels in the airway samples, both nasal swabs and NPA, were in many  
221 individuals significantly higher after boost vaccination than they were in the acute stage of  
222 the disease (Figure 6D). In contrast, this was not noted for IgA levels to RBD (Figure 6D). On  
223 the other hand, individuals naïve to SARS-CoV-2 only had a modest but significant increase  
224 of IgG in NSW and NPA and of IgA in NSW after boost (Figure 6D). Despite IgG levels in NSW  
225 had the highest increase after boost in individuals naïve to SARS-CoV-2, levels were generally  
226 significantly lower as compared with those from COVID-19 patients (Figure 6E and  
227 Supplementary figure 5A).

228

## 229 **Discussion**

230 By now, it is well documented that higher systemic antibody levels are generated in severe  
231 as compared with mild COVID-19 (7-11, 21-23). In contrast, the presence and durability of  
232 antibodies against SARS-CoV-2 in the airways is much less understood. Nor is it known if and  
233 how respiratory antibody levels are influenced by SARS-CoV-2 vaccination in humans. In this  
234 study, we performed longitudinal analyses of systemic and upper and lower airway antibody  
235 responses in a clinically well-characterized and relatively large cohort of individuals with  
236 SARS-CoV-2 infection representing the full spectrum of COVID-19 severity ranging from  
237 asymptomatic infection to fatal disease. Matched analyses in blood and in the airways  
238 enabled us not only to address the magnitude and durability of systemic antibodies to SARS-  
239 CoV-2 but also to gain insights into the prospects of protective capacity locally in the mucosa  
240 at virus re-entry. This is one key aspect still largely unknown yet critical for our  
241 understanding of immunity to and protection from SARS-CoV-2. Furthermore, we studied

242 how the systemic versus airway antibody levels were affected by vaccination. Collectively,  
243 this data will contribute to a better understanding of long-term protective effects and  
244 whether vaccination is important to boost the capacity of virus neutralization in the airways  
245 and thus reducing re-infection and virus spread.

246

247 Airway mucus along the respiratory tract is thought to serve as a barrier that can trap  
248 respiratory viruses via virus glycoprotein-mucin interactions (24). However, it has been  
249 shown that local immobilization of respiratory viruses such as influenza viruses in the  
250 airways mostly occurs by binding with virus-specific antibodies present in the mucus (25). As  
251 the respiratory tract is the initial site of viral infection and replication, the levels of IgG and  
252 IgA against the RBD in the upper and lower airways are likely critical for SARS-CoV-2  
253 neutralization and could therefore help predict the ability of individuals to neutralize the  
254 virus locally in case of re-exposure. Low but detectable levels of antibodies to SARS-CoV-2  
255 have previously been reported in saliva during convalescence (26). However, measurements  
256 of antibodies in saliva may primarily represent plasma exudate from the gingiva (27) while  
257 respiratory secretions better reflect the mucosal responses. Sampling the respiratory  
258 mucosa is indeed more likely to be sensitive to sampling methods compared to blood draws.  
259 Ideally it is therefore important to sample multiple compartments to more comprehensively  
260 understand the immunity to SARS-CoV-2. In our study we found that IgG and IgA against the  
261 RBD can be readily detected in the upper and lower airways during acute disease and that  
262 such levels correlated with the systemic response at the same time point and also followed  
263 disease severity. However, for all the patients across disease severities, airway antibodies  
264 waned to low levels much faster than those in plasma during convalescence. Whether these  
265 low antibody levels observed at respiratory sites will be sufficient for preventing virus re-

266 entry or for protection is not known. The correlation between systemic and airway antibody  
267 levels during acute disease raises questions on whether the low levels of antibodies in the  
268 airways during convalescence are due to decreased antibody generation locally at mucosal  
269 sites or are rather caused by decreased dissemination from the periphery once systemic  
270 antibody levels start to wane. Antibodies in the upper respiratory tract have been shown to  
271 be dominated by secretory IgA which are mostly produced by plasma cells in the lamina  
272 propria of mucosa-associated lymphoid tissue (MALT) (28, 29). We detected high levels of  
273 IgA in the upper airways early during acute COVID-19 that rapidly declined during  
274 convalescence, following the pattern observed for systemic IgA levels here and in other  
275 reports (30-32). This suggests that at least some IgA disseminated into the airways from the  
276 circulation. In contrast, the dynamics of IgG were different in the respiratory samples  
277 compared to plasma with airway IgG following the same kinetics as IgA, while systemic IgG  
278 were well maintained up to 8 months.

279

280 When we assessed the presence of lymphocytes in the different airway compartments  
281 during acute disease, we observed higher proportion of B cells along with high antibody  
282 levels, especially IgA, in the nasopharynx, as compared with the nostril or the endotracheal  
283 space. It has previously been shown that the majority of antibody secreting cells generated  
284 after intranasal immunization with live-attenuated vaccines in rodents may reside in the  
285 respiratory tract rather than in the spleen and bone marrow (33) and that these cells secrete  
286 IgA early after a later challenge with the vaccination pathogen (34-36). Therefore, it is  
287 possible that B cells generated during SARS-CoV-2 infection also reside locally in the airways  
288 and contribute to antibody levels in the nasopharynx. While the antibody content in NPA  
289 and ETA could be influenced by differences in sampling methods and sample volumes, these

290 data suggest that antibody abundance and possibly virus neutralization via IgA differ along  
291 the respiratory tract and may be more pronounced in the nasopharynx compared to the  
292 lower airways. Altogether, our observations demonstrate that moderate and severe COVID-  
293 19 result in high levels of circulating antibodies and despite that IgG levels are well-  
294 maintained, antibody levels in the airways decline significantly after the acute phase.

295

296 Once antibody titers have waned below protective levels, the response to a secondary  
297 infection will mostly rely on the presence of resting antigen-specific memory B cells that can  
298 rapidly activate upon antigen re-exposure (13). Therefore, similar to other studies (18-20),  
299 we investigated the induction and maintenance of S-specific memory B cells. Importantly,  
300 because of the comprehensive range of disease severity represented in our cohort, we were  
301 able to compare the opposite ends of the COVID-19 disease spectrum by focusing on  
302 individuals with mild disease as compared with patients with moderate/severe disease who  
303 had the highest circulating IgG and IgA levels. Strikingly, despite the fact that these patients  
304 were at the opposite ends of the disease severity spectrum, they had comparable levels of S-  
305 specific memory B cells during convalescence. These appeared to be specific for epitopes on  
306 S outside of the RBD and were predominantly IgG+, rather than IgA+, which may affect the  
307 proportions of different isotypes subsequently produced in the event of antigen re-  
308 exposure.

309

310 Immunization at mucosal sites such as for example intranasal administration of live-  
311 attenuated influenza vaccines generally elicits mucosal immune responses (37). However,  
312 several studies, primarily performed with DNA and virus-like particles (VLP) vaccines, have  
313 shown that intradermal, subcutaneous and intramuscular immunization also can result in

314 local mucosal responses that protect from mucosal challenge (38). It has been speculated  
315 that this could be due to free antigen or B cells migrating from the vaccine draining lymph  
316 nodes to the MALT (38-40). A two-dose regimen of Moderna's mRNA-1273 vaccine  
317 administered intramuscularly and followed by intranasal and intratracheal challenge with  
318 SARS-CoV-2 in rhesus macaques has indeed shown to result in local virus neutralization in  
319 the airways (41). Antibodies in bronchoalveolar lavage and nasal swabs were elicited in a  
320 vaccine dose-dependent manner assessed after the boost vaccination (42).

321

322 Whether the systemic and/or mucosal immunity generated during natural infection is  
323 boosted by vaccination and results in a similar or enhanced magnitude of responses would  
324 be important knowledge to acquire for planning the best vaccination strategies for SARS-  
325 CoV-2 as well as for other respiratory viruses. Our results on individuals recovering from  
326 COVID-19 and subsequently receiving vaccination indicated a marked increase of both IgG  
327 and IgA levels systemically but also strikingly in the airways, which in the majority of cases  
328 exceeded the levels observed during acute disease. In contrast, vaccination of individuals  
329 naïve to SARS-CoV-2 only resulted in a modest increase of airway antibodies, mainly IgG,  
330 after boost vaccination. Notably, the antibody increase observed between prime and boost  
331 vaccination in the patients was more prominent in the airways than systemically. Recent  
332 studies on systemic antibody responses after SARS-CoV-2 vaccination in individuals who  
333 recovered from COVID-19 have shown a significant increase in antibody levels after one  
334 vaccine dose with no or only a small increase after the second dose (43-47). This suggests  
335 that one vaccine dose may be sufficient to protect these individuals from disease in case of  
336 re-infection which is important for vaccine dose management at the population level.  
337 However, our data indicate that only assessing the systemic antibody levels after vaccination

338 is to some extent misleading as respiratory antibody levels, and likely virus neutralization,  
339 may be substantially better with a prime-boost vaccination strategy rather than with one  
340 single dose. Two earlier studies have been able to demonstrate neutralizing activity of  
341 antibodies in the upper respiratory tract after vaccination in individuals who earlier had  
342 COVID-19 (49, 50).

343

344 The higher levels of airway antibodies that we observed after two vaccine doses may be  
345 explained by that even a small increase in circulating antibodies after the boost causes a  
346 substantial extravasation from the bloodstream into mucosal sites (Supplementary figure  
347 5B). On the other hand, the fact that naïve individuals had less pronounced airway  
348 antibodies after vaccination despite they elicited relatively high plasma antibody levels  
349 suggests that airway antibody responses are better primed with natural infection and that  
350 vaccination after COVID-19 stimulates anamnestic local mucosal responses. It remains to be  
351 investigated how airway antibodies induced after intranasal vaccination would compare to  
352 natural infection and whether an intramuscular vaccine boost would affect these responses  
353 (48).

354

355 In summary, here we show that COVID-19 disease severity not only determines the  
356 magnitude of systemic but also airway antibody levels with efficient generation of virus-  
357 specific memory B cells against SARS-CoV-2 also occurring upon mild disease. While plasma  
358 IgG levels were generally well detectable after acute disease in all groups, there was a  
359 significant decline in airway antibodies during convalescence. This suggests that antibodies  
360 in the airways may not be maintained at levels that prevent local virus entry upon re-  
361 exposure. However, our data indicate that the majority of infected individuals have the

362 ability to generate anamnestic responses via the memory B cell pool and that vaccination  
363 against SARS-Cov-2 resulted in a substantial rebound of both systemic and airway antibodies  
364 in patient who recovered from COVID-19. These data indicate a positive effect of vaccination  
365 for increased virus neutralization in the airways and prospects of reduced virus spread,  
366 which further supports following the full vaccination schedule also in this population.

367

## 368 **Methods**

### 369 **Study design, patient enrollment and sample collection**

370 One hundred and forty-seven (147) PCR-confirmed SARS-CoV-2 infected patients were  
371 enrolled at the Karolinska University Hospital and Haga Outpatient Clinic (Haga Närakut),  
372 Stockholm, Sweden during March-May 2020 (acute phase) in a time that ranged from 0 to  
373 54 days from onset of symptoms as self-reported by individual patients; and during April-  
374 September 2020 (3 months) in a time that ranged from 46 to 168 days and during November  
375 2020 to February 2021 (8 months) continuing from the previous counts. Patients were  
376 enrolled at various settings, ranging from primary to intensive care. In order to recruit  
377 asymptomatic and mild cases, household contacts of COVID-19 patients were enrolled and  
378 screened with PCR to identify SARS-CoV-2 positive individuals. A small subset of these  
379 individuals who experienced influenza-like symptoms and were possibly exposed to SARS-  
380 Cov-2 but had a negative diagnostic PCR (PCR-) (n=9 of whom 3 were household contacts of  
381 confirmed patients with 1 experiencing fever, and 6 were included based on suspected  
382 infection with 4 experiencing fever) were sampled in the same way and included as controls  
383 alongside with 30 pre-pandemic healthy control samples (PPHC) from 2016-2018. Twelve  
384 individuals naïve to SARS-CoV-2 were also recruited at the Umeå University, Umeå, Sweden  
385 as a control group for vaccination (Table 2). These individuals were identified as naïve to



386 SARS-CoV-2 based on lack of COVID-19 symptoms and positive diagnostic PCR test  
387 throughout the pandemic in combination with absence of plasma antibodies against SARS-  
388 CoV-2 prior to vaccination.

389

390 Respiratory failure was categorized daily according to the respiratory domain of the  
391 Sequential Organ Failure Assessment score (SOFA) (14). The modified SOFA score (mSOFA)  
392 was calculated when arterial partial pressure of oxygen ( $\text{PaO}_2$ ) was not available. In this case  
393 peripheral transcutaneous hemoglobin saturation ( $\text{SpO}_2$ ) was used instead (15). Estimation  
394 of the fraction of inspired oxygen ( $\text{FiO}_2$ ) based on  $\text{O}_2$  flow was calculated as per the Swedish  
395 Intensive Care register definition (51). Patients were categorized based on the peak  
396 respiratory SOFA or mSOFA value with the 4-point respiratory SOFA score being extended  
397 with additional levels to distinguish between admitted and non-admitted mild cases (both  
398 respiratory SOFA score 0) and to include fatal outcome. Ten (10) patients with fatal outcome  
399 had peak disease severity score 6 prior to death and 2 patients had scores of 4 and 5. For  
400 convenience, the resulting 7-point composite peak disease severity (PDS) was condensed  
401 into a broader classification consisting of mild (1-2), moderate (3-4), severe (5-6), and fatal  
402 (7). Demographics and additional data were collected from medical records, including  
403 clinical history and risk factors such as BMI and co-morbidities. Total burden of comorbidities  
404 was assessed using the Charlson co-morbidity index (CCI) (52) (Table 1). Additional clinical  
405 information on this patient cohort including the modulation of disease from time to study  
406 inclusion to peak severity can be found in Falck-Jones et al (16).

407

408 Blood was collected in EDTA-containing tubes from all patients except those admitted to the  
409 intensive care unit (ICU) for whom blood was pooled from heparin-coated blood gas syringes

410 discarded in the last 12 hours. For some ICU patients, additional venous blood was also  
411 collected in EDTA tubes. Nostril swabs (NSW) and nasopharyngeal aspirates (NPA) were  
412 collected from the majority of the patients whereas endotracheal aspirates (ETA) were only  
413 collected from patients with mechanical ventilation intubated in the ICU. Admitted patients  
414 were sampled during acute disease at up to four timepoints and ICU patient material was  
415 collected up to ten timepoints. For this study, unless otherwise stated, the measurements  
416 referring to acute disease were performed with samples collected at the time of study  
417 inclusion and when patients returned for their follow-up visits at 3 and 8 months from  
418 symptom onset. At follow-up sampling, all study individuals had been discharged (if  
419 hospitalized) from the infectious diseases ward but some individuals (<10) who recovered  
420 from severe COVID-19 were still in a hospital aftercare ward at the first follow-up sampling.  
421 All study participants were confirmed SARS-CoV-2 negative by PCR at the time of follow-up  
422 sampling, with the exception of 5 individuals who were PCR+ but with high Ct values (>34).

423

#### 424 **Enzyme-linked immunosorbent assay (ELISA)**

425 The presence of IgG or IgA binding against the SARS-CoV-2 Nucleocapsid (N) and Spike (S)  
426 trimer or the Receptor Binding Domain (RBD) monomer (5, 6) in plasma and airway samples  
427 was assessed by enzyme-linked immunosorbent assay (ELISA). Recombinant proteins were  
428 received through the global health-vaccine accelerator platforms (GH-VAP) funded by the  
429 Bill & Melinda Gates Foundation, Seattle, WA, USA. Briefly, 96-half well plates were coated  
430 with 50ng/well of the respective protein. Plates were incubated with a selected duplicate  
431 dilution that did not provide background noise against ovalbumin used as a negative control  
432 (data not shown) (i.e. 1:20 for plasma samples, 1:2 for NSW and NPA, and 1:5 for ETA in 5%  
433 milk/PBS buffer). Duplicate 7-point serial dilutions were initially performed for measuring

434 plasma IgG against RBD during acute disease and after vaccination. The half maximal  
435 effective concentration ( $EC_{50}$ ) or the endpoint titer (dilution at the set OD value of 0.1) were  
436 calculated using GraphPad Prism 9. The relation between  $EC_{50}$  and endpoint titer for these  
437 samples is shown in Supplementary figure 5C. However, since for several samples with low  
438 antibody concentration (mostly from the asymptomatic/mild category) the  $EC_{50}$  was below  
439 the highest dilution used (of 1:20) and therefore below the limit of detection  
440 (Supplementary figure 6A), the maximal optical density (OD) at 1:20 dilution was used for  
441 most of the analyses. The relation between maximal OD and  $EC_{50}$  was verified in a subset of  
442 patients with high IgG and IgA against S (Supplementary figure 6B). To be able to compare  
443 pre- and post-vaccination antibody levels that would, in some instances, fall below and  
444 above the lower and upper limits of detection, the endpoint titer was used instead.  
445 Detection was performed with mouse and goat anti-human IgG or IgA HRP-conjugated  
446 secondary antibodies (clone G18-145 from BD Biosciences and polyclonal from  
447 ThermoFisher, respectively) followed by incubation with TMB substrate (BioLegend) which  
448 was stopped with a 1M solution of sulfuric acid. Blocking with 5% milk/PBS buffer and  
449 washing with 0.1% Tween-20/PBS buffer were performed between each step. Absorbance  
450 was read at 450nm and background correction at 550nm using an ELISA reader. Data were  
451 reported as maximal absorbance i.e. OD, as stated above, and plotted using GraphPad Prism  
452 9. All of the antibody measurements in plasma and respiratory samples from SARS-CoV-2  
453 patients were run alongside with samples from two different control groups as described  
454 above. Interestingly, low but readily detectable IgA reactivity against S was detected in the  
455 pre-pandemic healthy controls and in the PCR- individuals (Supplementary figure 6C). After  
456 having verified the specificity and sensitivity of our ELISA assay for IgA detection with  
457 limiting sample dilutions (Supplementary figure 6D-E), we hypothesize that this might be due

458 to cross-reactivity on the shared portions of the S protein between SARS-CoV-2 and other  
459 common cold coronaviruses. Reports have shown that cross-reactivity between  
460 coronaviruses exists (53, 54).

461

## 462 **Flow cytometry**

463 Staining of cells from airway samples was performed fresh. Briefly, samples were centrifuged  
464 at 400 g for 5 min at room temperature and cells were washed with sterile PBS. Mucus was  
465 removed using a 70  $\mu$ m cell strainer and cells were subsequently stained with the  
466 appropriate combination of fluorescently labelled monoclonal antibodies as illustrated in  
467 Figure 5A and in Table 3A. Staining of PBMC was performed on previously cryopreserved  
468 samples. The appropriate combination of fluorescently labelled monoclonal antibodies  
469 binding to different cell surface markers and with fluorescently labelled S and RBD proteins  
470 used as probes for antigen-specific B cells is illustrated in Figure 5C and in Table 3B. Probes  
471 were prepared from biotinylated proteins using a 4:1 molar ratio (protein:fluorochrome-  
472 labelled streptavidin) considering the molecular weight of protein monomers and of the  
473 streptavidin only. The probes were prepared using streptavidin conjugated to PE and APC for  
474 S and with BV421 for the RBD. The gating strategy for the identification of antigen-specific  
475 memory B cells is shown in Figure 5C. Briefly, after identification of lymphocytes in single  
476 suspension, live B cells, (i.e. cells not expressing CD3/,CD14/CD16/CD56) were gated. From  
477 this gate, B cells were further isolated by expression of CD19 and CD20 and then switched  
478 memory B cells were identified as IgD-IgM-. From these, S-specific switched memory B cells  
479 were identified by binding to both S protein probes. Further characterization was then  
480 carried out by analyzing IgG expression (IgA+ switched memory B cells are assumed to mirror  
481 IgD-IgM-IgG- B cells) and fluorescently labelled RBD. Stained cells from airway samples were

482 acquired using a BD LSRFortessa while stained PBMC were acquired using a BD FACSAria  
483 Fusion both interfaced with the BD FACSDiva Software. Results were analyzed using BD  
484 FlowJo version 10.

485

#### 486 **Statistics**

487 Spearman correlation was used to assess the interdependence of 2 different non-categorical  
488 parameters across individuals whereas Wilcoxon matched-pairs signed rank or Mann–  
489 Whitney U tests as appropriate, were used to assess differences or similarities for one single  
490 parameter between 2 different groups. Kruskal -Wallis with Dunn’s multiple comparisons  
491 test was used when assessing comparison between multiple groups. All of the above  
492 statistical analyses were performed using GraphPad Prism 9.

493

494 The effect of disease severity on the acute response was estimated using linear regression.  
495 We estimated both unadjusted models, as well as models adjusted for age, gender, days  
496 from onset of symptoms and CCI (Charlson Comorbidity Index). The longitudinal models  
497 using splines were estimated using multivariate multiple regression. The splines used were  
498 linear, with knots placed on days 15 and 50. The location of the knots was chosen based on  
499 visual inspection of the data, aided by kernel smoothing. The effect on standard deviations  
500 from repeated measures was not adjusted for, as the primary focus of the longitudinal  
501 analysis was description rather than statistical testing. Analysis was done in R, version 4.1.0  
502 (R Core Team (2021). R: A language and environment for statistical computing. R Foundation  
503 for Statistical Computing, Vienna, Austria. URL [https://www.R-project.org/.](https://www.R-project.org/))  
504 When not stated otherwise, p-values smaller than 0.05 were considered statistically  
505 significant.

506 **Study approval**

507 The study was approved by the Swedish Ethical Review Authority, and performed according  
508 to the Declaration of Helsinki. Written informed consent was obtained from all patients and  
509 controls. For sedated patients, the denoted primary contact was contacted and asked about  
510 the presumed will of the patient and to give initial oral and subsequently signed written  
511 consent. When applicable, retrospective written consent was obtained from patients with  
512 non-fatal outcomes.

513

514 **Author contributions**

515 Experimental study design: A.C., Ka.L. and A.S-S. Clinical concept design: A.S-S., M.B., N.J.,  
516 J.A., J.S., A.F. and M.F. Acquisition and sample processing: A.C., M.Y., S. F-J., S.V., B.Ö., E.Å.,  
517 L.A., R.F-J., M.Ö., F.G., J.S., M. E. J.M. and C.A. Generation of data: A.C., M.Y., S. F-J., S.V., L.A.  
518 and P.C.G. Provision of custom reagents: D.P., M.M., L.C., and N.P.K. Analysis and  
519 interpretation of data: A.C., Ka.L. and A.S-S. Critical revision of the manuscript: all authors.  
520 Statistical analysis: A.C., A.W., K.L. and S.O. Ka.L. and A.S-S. contributed equally to the study.

521

522 **Acknowledgments**

523 We thank the patients and healthy volunteers who have contributed to this study. We would  
524 also like to thank Alicia Edin, Andy Dernstedt, Mikaela Lagerkvist, Emma Stenlund, Maj  
525 Järner, medical students and hospital staff for assistance with patient sampling, collection of  
526 clinical data and sample processing, the Biomedicum BSL3 core facility, Karolinska Institutet  
527 and Fredrika Hellgren for assistance with English editing. This work was supported by grants  
528 from the Swedish Research Council, the Swedish Heart-Lung Foundation, the Bill & Melinda

529 Gates Foundation, the Knut and Alice Wallenberg Foundation through SciLifeLab and

530 Karolinska Institutet.

531

532 **References**

533

534 1. Gandhi RT, Lynch JB, and Del Rio C. Mild or Moderate Covid-19. *N Engl J Med*.

535 2020;383(18):1757-66.

536 2. Berlin DA, Gulick RM, and Martinez FJ. Severe Covid-19. *N Engl J Med*.

537 2020;383(25):2451-60.

538 3. Brodin P. Immune determinants of COVID-19 disease presentation and severity. *Nat*

539 *Med*. 2021;27(1):28-33.

540 4. Moghadas SM, Fitzpatrick MC, Sah P, Pandey A, Shoukat A, Singer BH, et al. The

541 implications of silent transmission for the control of COVID-19 outbreaks. *Proc Natl*

542 *Acad Sci U S A*. 2020.

543 5. Walls AC, Park YJ, Tortorici MA, Wall A, McGuire AT, and Veessler D. Structure,

544 Function, and Antigenicity of the SARS-CoV-2 Spike Glycoprotein. *Cell*.

545 2020;181(2):281-92 e6.

546 6. Wrapp D, Wang N, Corbett KS, Goldsmith JA, Hsieh CL, Abiona O, et al. Cryo-EM

547 structure of the 2019-nCoV spike in the prefusion conformation. *Science*.

548 2020;367(6483):1260-3.

549 7. Gaebler C, Wang Z, Lorenzi JCC, Muecksch F, Finkin S, Tokuyama M, et al. Evolution of

550 antibody immunity to SARS-CoV-2. *Nature*. 2021;591(7851):639-44.

551 8. Atyeo C, Fischinger S, Zohar T, Slein MD, Burke J, Loos C, et al. Distinct Early

552 Serological Signatures Track with SARS-CoV-2 Survival. *Immunity*. 2020;53(3):524-32

553 e4.



- 554 9. Gudbjartsson DF, Norddahl GL, Melsted P, Gunnarsdottir K, Holm H, Eythorsson E, et  
555 al. Humoral Immune Response to SARS-CoV-2 in Iceland. *N Engl J Med*.  
556 2020;383(18):1724-34.
- 557 10. Guthmiller JJ, Stovicek O, Wang J, Changrob S, Li L, Halfmann P, et al. SARS-CoV-2  
558 Infection Severity Is Linked to Superior Humoral Immunity against the Spike. *mBio*.  
559 2021;12(1):e02940-20.
- 560 11. Zhao J, Yuan Q, Wang H, Liu W, Liao X, Su Y, et al. Antibody Responses to SARS-CoV-2  
561 in Patients With Novel Coronavirus Disease 2019. *Clin Infect Dis*. 2020;71(16):2027-  
562 34.
- 563 12. Piccoli L, Park YJ, Tortorici MA, Czudnochowski N, Walls AC, Beltramello M, et al.  
564 Mapping Neutralizing and Immunodominant Sites on the SARS-CoV-2 Spike Receptor-  
565 Binding Domain by Structure-Guided High-Resolution Serology. *Cell*. 2020.
- 566 13. Zielinski CE, Corti D, Mele F, Pinto D, Lanzavecchia A, and Sallusto F. Dissecting the  
567 human immunologic memory for pathogens. *Immunol Rev*. 2011;240(1):40-51.
- 568 14. Vincent JL, Moreno R, Takala J, Willatts S, De Mendonça A, Bruining H, et al. The  
569 SOFA (Sepsis-related Organ Failure Assessment) score to describe organ  
570 dysfunction/failure. On behalf of the Working Group on Sepsis-Related Problems of  
571 the European Society of Intensive Care Medicine. *Intensive Care Med*.  
572 1996;22(7):707-10.
- 573 15. Grissom CK, Brown SM, Kuttler KG, Boltax JP, Jones J, Jephson AR, et al. A modified  
574 sequential organ failure assessment score for critical care triage. *Disaster Med Public  
575 Health Prep*. 2010;4(4):277-84.

- 576 16. Falck-Jones S, Vangeti S, Yu M, Falck-Jones R, Cagigi A, Badolati I, et al. Functional  
577 monocytic myeloid-derived suppressor cells increase in blood but not airways and  
578 predict COVID-19 severity. *J Clin Invest.* 2021;131(6).
- 579 17. Hansen CB, Jarlhelt I, Perez-Alos L, Hummelshoj Landsy L, Loftager M, Rosbjerg A, et  
580 al. SARS-CoV-2 Antibody Responses Are Correlated to Disease Severity in COVID-19  
581 Convalescent Individuals. *J Immunol.* 2020.
- 582 18. Dan JM, Mateus J, Kato Y, Hastie KM, Yu ED, Faliti CE, et al. Immunological memory  
583 to SARS-CoV-2 assessed for up to 8 months after infection. *Science.* 2021.
- 584 19. Rodda LB, Netland J, Shehata L, Pruner KB, Morawski PA, Thouvenel CD, et al.  
585 Functional SARS-CoV-2-Specific Immune Memory Persists after Mild COVID-19. *Cell.*  
586 2021;184(1):169-83 e17.
- 587 20. Juno JA, Tan HX, Lee WS, Reynaldi A, Kelly HG, Wragg K, et al. Humoral and  
588 circulating follicular helper T cell responses in recovered patients with COVID-19. *Nat*  
589 *Med.* 2020.
- 590 21. Rydzynski Moderbacher C, Ramirez SI, Dan JM, Grifoni A, Hastie KM, Weiskopf D, et  
591 al. Antigen-Specific Adaptive Immunity to SARS-CoV-2 in Acute COVID-19 and  
592 Associations with Age and Disease Severity. *Cell.* 2020.
- 593 22. Lynch KL, Whitman JD, Lacanienta NP, Beckerdite EW, Kastner SA, Shy BR, et al.  
594 Magnitude and kinetics of anti-SARS-CoV-2 antibody responses and their relationship  
595 to disease severity. *Clin Infect Dis.* 2020.
- 596 23. Robbiani DF, Gaebler C, Muecksch F, Lorenzi JCC, Wang Z, Cho A, et al. Convergent  
597 antibody responses to SARS-CoV-2 in convalescent individuals. *Nature.* 2020.
- 598 24. Fahy JV, and Dickey BF. Airway mucus function and dysfunction. *N Engl J Med.*  
599 2010;363(23):2233-47.

- 600 25. Wang YY, Harit D, Subramani DB, Arora H, Kumar PA, and Lai SK. Influenza-binding  
601 antibodies immobilise influenza viruses in fresh human airway mucus. *Eur Respir J.*  
602 2017;49(1).
- 603 26. Isho B, Abe KT, Zuo M, Jamal AJ, Rathod B, Wang JH, et al. Persistence of serum and  
604 saliva antibody responses to SARS-CoV-2 spike antigens in COVID-19 patients. *Sci*  
605 *Immunol.* 2020;5(52).
- 606 27. Subbarao KC, Nattuthurai GS, Sundararajan SK, Sujith I, Joseph J, and Syedshah YP.  
607 Gingival Crevicular Fluid: An Overview. *J Pharm Bioallied Sci.* 2019;11(Suppl 2):S135-  
608 S9.
- 609 28. Reynolds HY. Immunoglobulin G and its function in the human respiratory tract.  
610 *Mayo Clin Proc.* 1988;63(2):161-74.
- 611 29. Pakkanen SH, Kantele JM, Moldoveanu Z, Hedges S, Hakkinen M, Mestecky J, et al.  
612 Expression of homing receptors on IgA1 and IgA2 plasmablasts in blood reflects  
613 differential distribution of IgA1 and IgA2 in various body fluids. *Clin Vaccine Immunol.*  
614 2010;17(3):393-401.
- 615 30. Sterlin D, Mathian A, Miyara M, Mohr A, Anna F, Claer L, et al. IgA dominates the  
616 early neutralizing antibody response to SARS-CoV-2. *Sci Transl Med.* 2020.
- 617 31. Cervia C, Nilsson J, Zurbuchen Y, Valaperti A, Schreiner J, Wolfensberger A, et al.  
618 Systemic and mucosal antibody responses specific to SARS-CoV-2 during mild versus  
619 severe COVID-19. *J Allergy Clin Immunol.* 2020.
- 620 32. Staines HM, Kirwan DE, Clark DJ, Adams ER, Augustin Y, Byrne RL, et al. Dynamics of  
621 IgG seroconversion and pathophysiology of COVID-19 infections. *medRxiv.* 2020.

- 622 33. Sealy R, Webby RJ, Crumpton JC, and Hurwitz JL. Differential localization and function  
623 of antibody-forming cells responsive to inactivated or live-attenuated influenza virus  
624 vaccines. *Int Immunol*. 2013;25(3):183-95.
- 625 34. Rudraraju R, Surman S, Jones B, Sealy R, Woodland DL, and Hurwitz JL. Phenotypes  
626 and functions of persistent Sendai virus-induced antibody forming cells and CD8+ T  
627 cells in diffuse nasal-associated lymphoid tissue typify lymphocyte responses of the  
628 gut. *Virology*. 2011;410(2):429-36.
- 629 35. Surman SL, Rudraraju R, Sealy R, Jones B, and Hurwitz JL. Vitamin A deficiency  
630 disrupts vaccine-induced antibody-forming cells and the balance of IgA/IgG isotypes  
631 in the upper and lower respiratory tract. *Viral Immunol*. 2012;25(4):341-4.
- 632 36. Surman SL, Jones BG, Sealy RE, Rudraraju R, and Hurwitz JL. Oral retinyl palmitate or  
633 retinoic acid corrects mucosal IgA responses toward an intranasal influenza virus  
634 vaccine in vitamin A deficient mice. *Vaccine*. 2014;32(22):2521-4.
- 635 37. Krammer F. The human antibody response to influenza A virus infection and  
636 vaccination. *Nat Rev Immunol*. 2019;19(6):383-97.
- 637 38. Su F, Patel GB, Hu S, and Chen W. Induction of mucosal immunity through systemic  
638 immunization: Phantom or reality? *Hum Vaccin Immunother*. 2016;12(4):1070-9.
- 639 39. Or-Guil M, Wittenbrink N, Weiser AA, and Schuchhardt J. Recirculation of germinal  
640 center B cells: a multilevel selection strategy for antibody maturation. *Immunol Rev*.  
641 2007;216:130-41.
- 642 40. Lycke NY, and Bemark M. The regulation of gut mucosal IgA B-cell responses: recent  
643 developments. *Mucosal Immunol*. 2017;10(6):1361-74.

- 644 41. Corbett KS, Flynn B, Foulds KE, Francica JR, Boyoglu-Barnum S, Werner AP, et al.  
645 Evaluation of the mRNA-1273 Vaccine against SARS-CoV-2 in Nonhuman Primates. *N*  
646 *Engl J Med*. 2020;383(16):1544-55.
- 647 42. Corbett KS, Nason MC, Flach B, Gagne M, O'Connell S, Johnston TS, et al. Immune  
648 Correlates of Protection by mRNA-1273 Immunization against SARS-CoV-2 Infection  
649 in Nonhuman Primates. *bioRxiv*. 2021:2021.04.20.440647.
- 650 43. Krammer F, Srivastava K, Alshammary H, Amoako AA, Awawda MH, Beach KF, et al.  
651 Antibody Responses in Seropositive Persons after a Single Dose of SARS-CoV-2 mRNA  
652 Vaccine. *N Engl J Med*. 2021;384(14):1372-4.
- 653 44. Saadat S, Rikhtegaran Tehrani Z, Logue J, Newman M, Frieman MB, Harris AD, et al.  
654 Binding and Neutralization Antibody Titers After a Single Vaccine Dose in Health Care  
655 Workers Previously Infected With SARS-CoV-2. *JAMA*. 2021;325(14):1467-9.
- 656 45. Goel RR, Apostolidis SA, Painter MM, Mathew D, Pattekar A, Kuthuru O, et al. Distinct  
657 antibody and memory B cell responses in SARS-CoV-2 naive and recovered individuals  
658 following mRNA vaccination. *Sci Immunol*. 2021;6(58).
- 659 46. Levi R, Azzolini E, Pozzi C, Ubaldi L, Lagioia M, Mantovani A, et al. A cautionary note  
660 on recall vaccination in ex-COVID-19 subjects. *medRxiv*. 2021:2021.02.01.21250923.
- 661 47. Samanovic MI, Cornelius AR, Wilson JP, Karmacharya T, Gray-Gaillard SL, Allen JR, et  
662 al. Poor antigen-specific responses to the second BNT162b2 mRNA vaccine dose in  
663 SARS-CoV-2-experienced individuals. *medRxiv*. 2021:2021.02.07.21251311.
- 664 48. Lund FE, and Randall TD. Scent of a vaccine. *Science*. 2021;373(6553):397-9.
- 665 49. Planas D, Bruel T, Grzelak L, Guivel-Benhassine F, Staropoli I, Porrot F, et al.  
666 Sensitivity of infectious SARS-CoV-2 B.1.1.7 and B.1.351 variants to neutralizing  
667 antibodies. *Nat Med*. 2021.

- 668 50. Mades A, Chellamathu P, Lopez L, Kojima N, MacMullan MA, Denny N, et al.  
669 Detection of persistent SARS-CoV-2 IgG antibodies in oral mucosal fluid and upper  
670 respiratory tract specimens following COVID-19 mRNA vaccination. *medRxiv*.  
671 2021:2021.05.06.21256403.
- 672 51. Intensivvårdsregistret S. SIR:s riktlinje för registrering av SOFA. .  
673 <https://www.icuregswe.org/globalassets/riktlinjer/sofa.pdf>.
- 674 52. Charlson ME, Pompei P, Ales KL, and MacKenzie CR. A new method of classifying  
675 prognostic comorbidity in longitudinal studies: development and validation. *J Chronic*  
676 *Dis*. 1987;40(5):373-83.
- 677 53. Grifoni A, Weiskopf D, Ramirez SI, Mateus J, Dan JM, Moderbacher CR, et al. Targets  
678 of T Cell Responses to SARS-CoV-2 Coronavirus in Humans with COVID-19 Disease  
679 and Unexposed Individuals. *Cell*. 2020;181(7):1489-501 e15.
- 680 54. Song G, He WT, Callaghan S, Anzanello F, Huang D, Ricketts J, et al. Cross-reactive  
681 serum and memory B cell responses to spike protein in SARS-CoV-2 and endemic  
682 coronavirus infection. *bioRxiv*. 2020.  
683  
684  
685

686 **Table 1.** Clinical characterization of the SARS-CoV-2 infected cohort

| Peak disease severity                                    | 1             | 2             | 3             | 4             | 5*            | 6*            | 7            |
|----------------------------------------------------------|---------------|---------------|---------------|---------------|---------------|---------------|--------------|
| Resp. SOFA score                                         | 0             | 0             | 1             | 2             | 3             | 4             |              |
| Admitted (Y/N)                                           | N             | Y             | Y             | Y             | Y             | Y             | Y            |
| PFI (kPa)                                                | > 53          | > 53          | < 53          | < 40          | < 27          | < 13          | -            |
| SFI                                                      | > 400         | > 400         | ≤ 400         | ≤ 315         | ≤ 235         | < 150         |              |
| No. of individuals (%)                                   | 13 (8.8)      | 6 (4.1)       | 10 (6.8)      | 48 (33)       | 19 (13)       | 39 (27)       | 12 (8.2)     |
| Age, mean (Range)                                        | 44 (24-72)    | 60 (41-72)    | 56 (46-78)    | 55 (24-76)    | 57 (42-74)    | 61 (25-77)    | 66 (52-78)   |
| Male (%)                                                 | 5 (38)        | 2 (33)        | 6 (60)        | 38 (79)       | 15 (79)       | 34 (87)       | 9 (75)       |
| Days from symptoms to admission – median (Range)         | -             | 10 (0-14)     | 8.5 (4-14)    | 10 (3-21)     | 7 (2-14)      | 10 (2-35)     | 7 (1-28)     |
| Days from symptoms to inclusion “Acute” – median (Range) | 9 (3-44)      | 11 (0-20)     | 13.5 (6-18)   | 13 (4-32)     | 21 (5-40)     | 22 (7-54)     | 13 (8-44)    |
| Days from symptoms to 3-Mo follow-up – median (Range)    | 102 (88-136)  | 99,5 (82-103) | 112 (81-127)  | 109 (46-155)  | 109 (48-130)  | 120 (53-168)  | -            |
| Days from symptoms to 8-Mo follow-up – median (Range)    | 232 (187-264) | 238 (212-250) | 245 (227-303) | 247 (233-314) | 241 (220-270) | 254 (224-344) | -            |
| VL (Ct value) median (Range)                             | 27.5 (40-14)  | 25.0 (29-14)  | 26.7 (36-15)  | 26.8 (36-12)  | 25.8 (36-19)  | 24.0 (37-14)  | 20.5 (32-13) |
| CCI, mean (SD)                                           | 1 (2)         | 2 (1)         | 1 (1)         | 2 (2)         | 2 (1)         | 2 (1)         | 3 (1)        |
| BMI, mean (SD)                                           | 24.1 (4.5)    | 25.1 (2.2)    | 26.0 (3.2)    | 30.3 (4.2)    | 29.2 (5.3)    | 28.6 (4.7)    | 28.6 (2.4)   |
| Hypertension (%)                                         | 1 (8.3)       | 0 (0)         | 2 (20)        | 20 (42)       | 8 (42)        | 15 (38)       | 9 (75)       |
| Diabetes (%)                                             | 2 (17)        | 0 (0)         | 1 (10)        | 14 (29)       | 5 (26)        | 9 (23)        | 3 (25)       |
| Current smokers (%)                                      | 0 (0)         | 0 (0)         | 2 (20)        | 5 (11)        | 1 (5.3)       | 2 (5.3)       | 0 (0)        |
| ACE-I (%)                                                | 0 (0)         | 0 (0)         | 0 (0)         | 5 (10)        | 1 (5.3)       | 4 (10)        | 1 (9.1)      |
| IS drugs (%)                                             | 1 (7.7)       | 0 (0)         | 0 (0)         | 4 (8.3)       | 2 (11)        | 5 (13)        | 1 (8.3)      |

687 Peak disease severity: 1-2 (Mild), 3-4 (Moderate), 5-6 (Severe), 7 (Fatal)

688 Resp. SOFA: Respiratory Sequential Organ Failure Assessment

689 PFI: PaO<sub>2</sub>/FiO<sub>2</sub>-index

690 SFI: SpO<sub>2</sub>/FiO<sub>2</sub>-index

691 VL: Viral Load

692 CCI: Charlson comorbidity index

693 BMI: body mass index

694 ACE-I: angiotensin converting enzyme-inhibitors

695 IS: immunosuppressive

696 \*Requires mechanical ventilation

697

698 **Table 2.** Peak disease severity and longitudinal sampling timeline of patients and individuals

699 naïve to SARS-CoV-2 vaccinated against SARS-CoV-2.

| PDS | Acute* | 3 Mo* | 8 Mo* | Vax* | Prime** | Boost** | Vaccine         |
|-----|--------|-------|-------|------|---------|---------|-----------------|
| 1   | 24     | 129   | 240   | 338  | 7       |         | AstraZeneca     |
| 1   | 9      | 113   | 266   | 308  | 7       | 7       | AstraZeneca     |
| 1   | 7      | 92    | 128   | 350  | 7       | 7       | Moderna         |
| 3   | 15     | 90    | 250   | 358  | 7       | 7       | AstraZeneca     |
| 3   | 14     | 127   | 238   | 322  | 11      | 7       | AstraZeneca     |
| 4   | 10     | 100   | 254   | 345  | 16      | 13      | Pfizer–BioNTech |
| 4   | 23     | 84    | 252   | 339  | 9       | 13      | AstraZeneca     |
| 4   | 12     | 153   | 244   | 407  | 7       | 7       | Moderna         |
| 4   | 16     | 138   | 245   | 426  | 7       | 7       | Pfizer–BioNTech |
| 4   | 16     | 106   | 237   | 399  | 7       | 7       | Pfizer–BioNTech |
| 4   | 28     | 134   | 257   | 386  | 7       | 7       | Pfizer–BioNTech |
| 4   | 18     | 102   | NS    | 355  | 7       | 7       | Pfizer–BioNTech |
| 5   | 24     | 109   | 231   | 340  | 7       | 7       | Moderna         |
| 6   | 22     | 98    | 244   | 329  | 8       | 8       | Pfizer–BioNTech |
| 6   | 34     | 139   | 260   | 308  | NS      | 7       | Pfizer–BioNTech |
| 6   | 38     | 144   | 301   | 324  | 14      | 28      | Pfizer–BioNTech |
| 6   | 43     | 142   | 254   | 339  | 11      | 13      | Pfizer–BioNTech |
| 6   | 21     | 124   | 226   | 270  | NS      | 21      | Pfizer–BioNTech |
| 6   | 30     | 92    | NS    | 286  | 8       | 10      | Moderna         |
| 6   | 8      | 86    | 262   | 407  | 7       | 7       | Moderna         |
| 0   | NA     | NA    | NA    | NA   | 9       | 9       | Moderna         |
| 0   | NA     | NA    | NA    | NA   | 10      | 6       | Moderna         |
| 0   | NA     | NA    | NA    | NA   | 9       | 9       | Moderna         |
| 0   | NA     | NA    | NA    | NA   | 9       | 9       | Moderna         |
| 0   | NA     | NA    | NA    | NA   | 9       | 9       | Moderna         |
| 0   | NA     | NA    | NA    | NA   | 9       | 8       | Moderna         |
| 0   | NA     | NA    | NA    | NA   | 9       | 9       | Moderna         |
| 0   | NA     | NA    | NA    | NA   | 9       | 8       | Moderna         |
| 0   | NA     | NA    | NA    | NA   | 9       | 7       | Pfizer–BioNTech |
| 0   | NA     | NA    | NA    | NA   | 8       | 7       | Pfizer–BioNTech |
| 0   | NA     | NA    | NA    | NA   | 8       | 7       | Pfizer–BioNTech |
| 0   | NA     | NA    | NA    | NA   | 7       | 7       | Pfizer–BioNTech |

700 PDS: Peak disease severity

701 M=male, F=female, O=other

702 NS=not sampled

703 NA=not applicable

704 \*Days from onset of symptoms

705 \*\*Days from prime/boost



706 AstraZeneca (Vaxzevria)  
707 Pfizer-BioNTec (Comirnaty)  
708 Moderna (mRNA-1273)  
709

710 **Table 3.** Flow cytometry panels.

711

712

713 **A)** Immunophenotyping of leukocyte subsets in airway samples.

714

| Fluorochrome    | Marker         | Company       | Cat. No.    | Clone   |
|-----------------|----------------|---------------|-------------|---------|
| PerCP-Cy5.5     | CD3            | BD            | 552852      | SP34-2  |
| FITC            | CD56           | BioLegend     | 318304      | HCD56   |
| PE-Cy7          | CD123          | BD            | 560826      | 7G3     |
| PE-Cy5          | CD16           | BD            | 555408      | 3G8     |
| PE              | Lox-1          | BioLegend     | 358603      | 15C4    |
| APC-Vio770      | CD66           | Miltenyi      | 130-119-847 | TET2    |
| Alexa Fluor 700 | CD4            | BD            | 560836      | L200    |
| APC             | CD45           | BD            | 555485      | HI30    |
| BV786           | CD11c          | BD            | 740966      | B-ly6   |
| BV650           | HLA-DR         | BioLegend     | 307650      | L243    |
| BV510           | CD14           | BD            | 740187      | SP34-2  |
| Pacific Blue    | CD19           | Thermo Fisher | MHCD1928    | SJ25-C1 |
| (DAPI)          | Live/Dead Blue | Thermo Fisher | L-23105     |         |

715

716

717 **B)** Staining of circulating antigen-specific memory B cells.

718

| Fluorochrome    | Marker | Company          | Cat. No. | Clone      |
|-----------------|--------|------------------|----------|------------|
| PerCP-Cy5.5     | IgM    | BD               | 561285   | G20-127    |
| FITC            | IgD    | Southern Biotech | 2030-02  | Polyclonal |
| (PE-Cy5)        | 7AAD   | Thermofisher     | A1210    |            |
| ECD             | CD19   | Beckman Coulter  | IM2708U  | J3-119     |
| PE              | Spike  |                  |          |            |
| Alexa Fluor 700 | CD27   | Biolegend        | 356416   | M-T271     |
| APC             | Spike  |                  |          |            |
| BV786           | IgG    | BD               | 564230   | G18-145    |
| BV605           | CD20   | BioLegend        | 302334   | 2H7        |
| BV510           | CD3    | BD               | 740187   | SP34-2     |
| "               | CD14   | BioLegend        | 301842   | M5E2       |
| "               | CD16   | BD               | 563830   | 3G8        |
| "               | CD56   | BD               | 740171   | B159       |
| BV421           | RBD    |                  |          |            |

719

720

**A** Longitudinal sampling of blood and airways

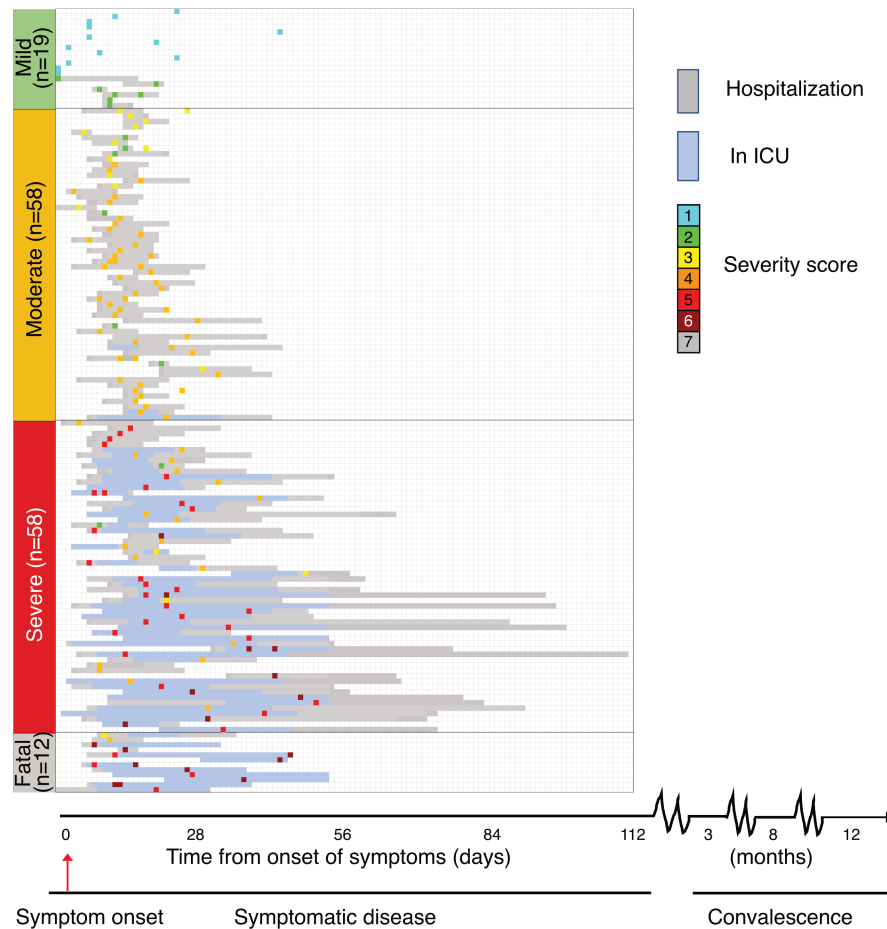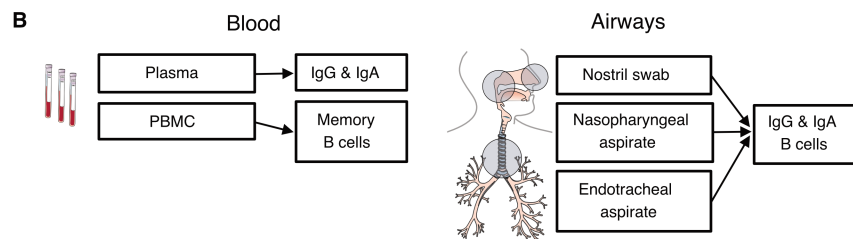

**Figure 1. Study and sampling overview. (A)** Overview of study cohort (n=147), timeline of longitudinal sampling, hospital admission/discharge, level of care and outcome for each patient. Patients are group based on peak disease severity (PDS); mild (PDS 1 and 2), moderate (PDS 3 and 4), severe (PDS 5 and 6) and fatal (PDS 7). Individual inclusion sample for each patient is color-coded based on disease severity at the time of sampling. **(B)** Overview of the anatomical compartments analyzed, and the measurements performed.

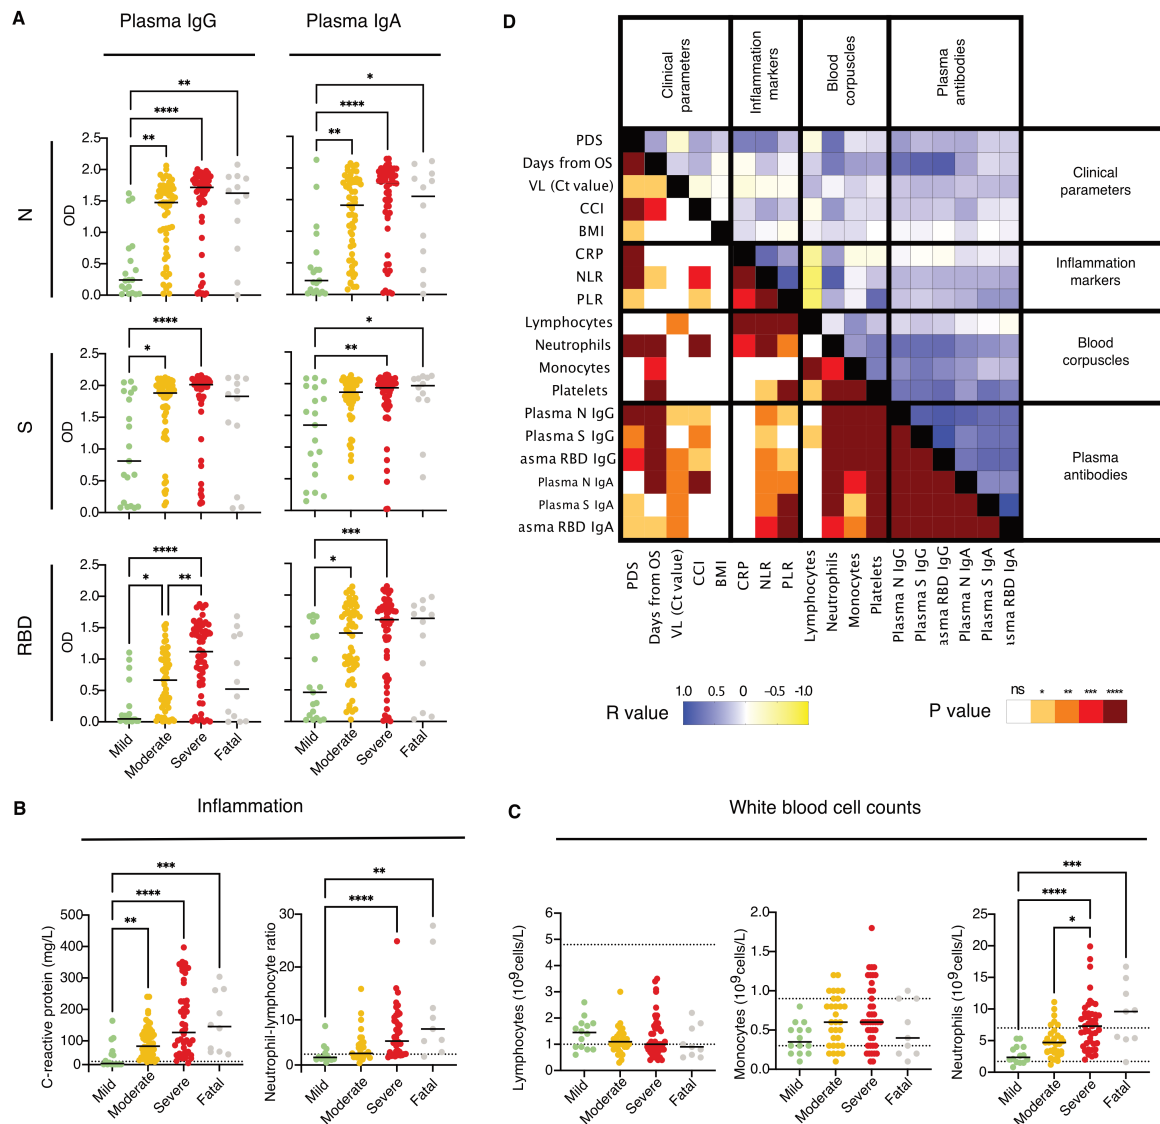

**Figure 2. Systemic antibody responses, inflammation markers and other clinical parameters in relation to COVID-19 severity during acute disease.** (A) Plasma IgG and IgA responses (n=19 for mild, n=58 for moderate, n=58 for severe and n=12 for fatal) against N, S and RBD are shown together with the levels of (B) C-reactive protein and the neutrophil-lymphocyte ratio as a measure of systemic inflammation and with (C) the levels of lymphocytes, monocytes and neutrophils. Black lines indicate medians. Differences were assessed using Kruskal -Wallis with Dunn's multiple comparisons test and considered statistically significant at  $p < 0.05$ . \*\*  $p < 0.01$ , \*\*\*  $p < 0.001$ , \*\*\*\*  $p < 0.0001$ . The dashed lines indicate the normal thresholds or range values. (D) Correlation matrix summarizing the interrelationship observed between the clinical parameters, inflammation markers, blood corpuscles and data from systemic antibody levels measured during acute disease as indicated. The P and R values (Spearman) are shown separately in the mirrored halves of the matrix and have been color-coded as indicated.

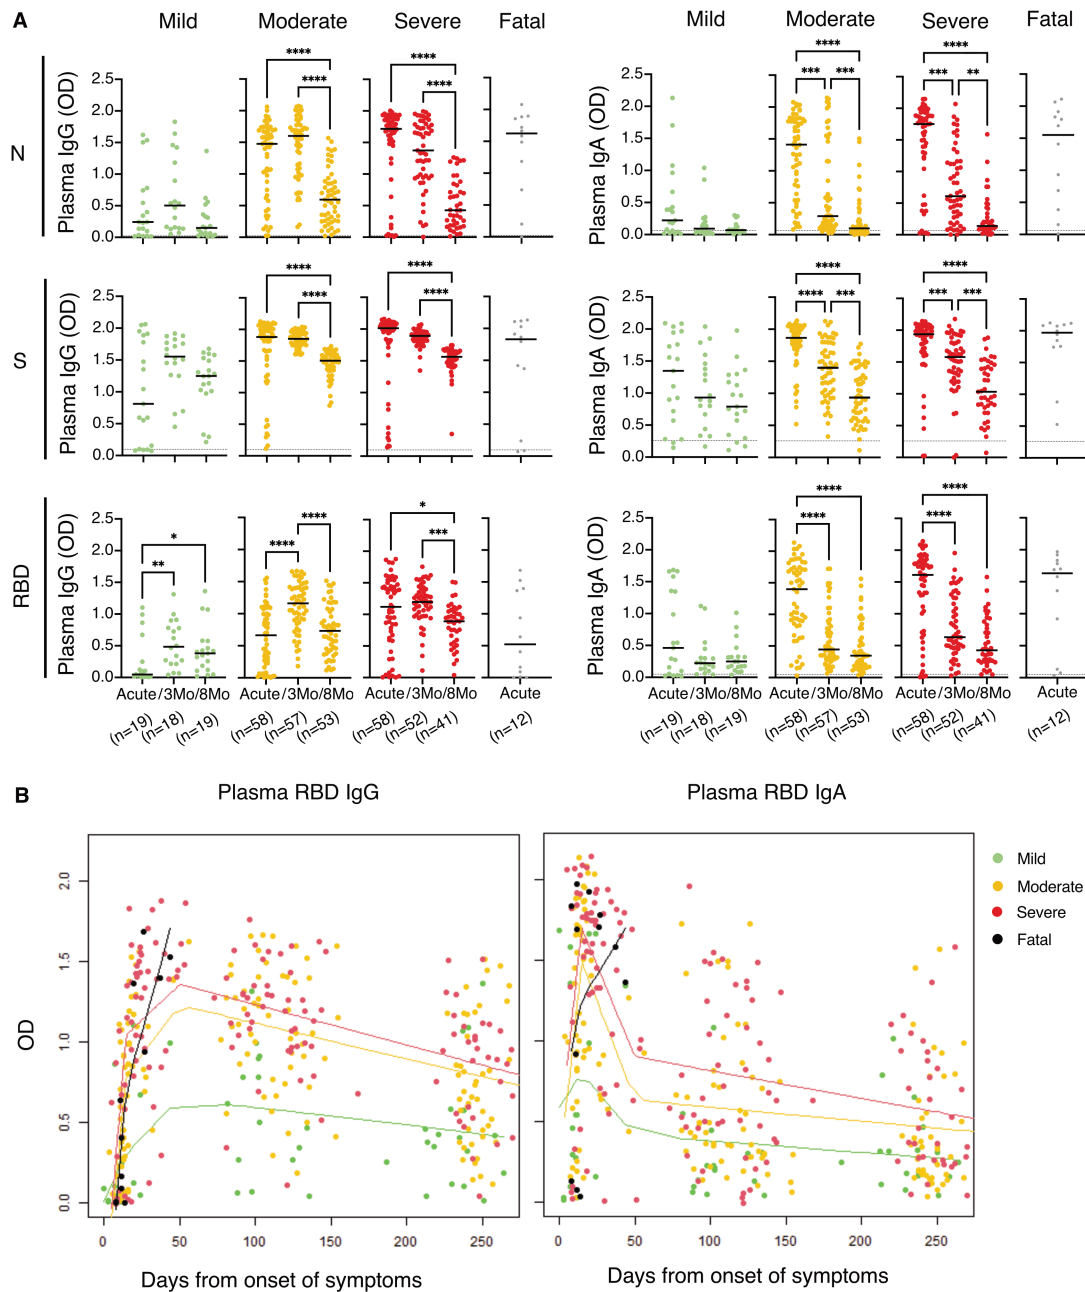

**Figure 3. Longitudinal systemic antibody responses across COVID-19 severity from acute disease up to 8 months from symptom onset. (A)** Individual levels of plasma IgG and IgA (from left to right) in SARS-CoV-2 infected individuals (n=147) with different peak disease severity (PDS). Black lines indicate medians and dotted lines indicate the average background level from pre-pandemic healthy controls. Kruskal-Wallis with Dunn's multiple comparisons was used to compare the groups and considered statistically significant at  $p < 0.05$ . \*\*  $p < 0.01$ , \*\*\*  $p < 0.001$ , \*\*\*\*  $p < 0.0001$ . **(B)** Splines graphs of the plasma RBD IgG and IgA level changes over time (n=19 for mild, n=58 for moderate, n=58 for severe and n=12 for fatal). All observations are graphed together with kernel smoothed curves and data points for each group color-coded as previously with the exception of the "Fatal" group which in this figure is highlighted in black. The bandwidth for the smoothing was set to 40, except for the "Fatal" group, for which, due to few and concentrated observations, the bandwidth was set to 10.

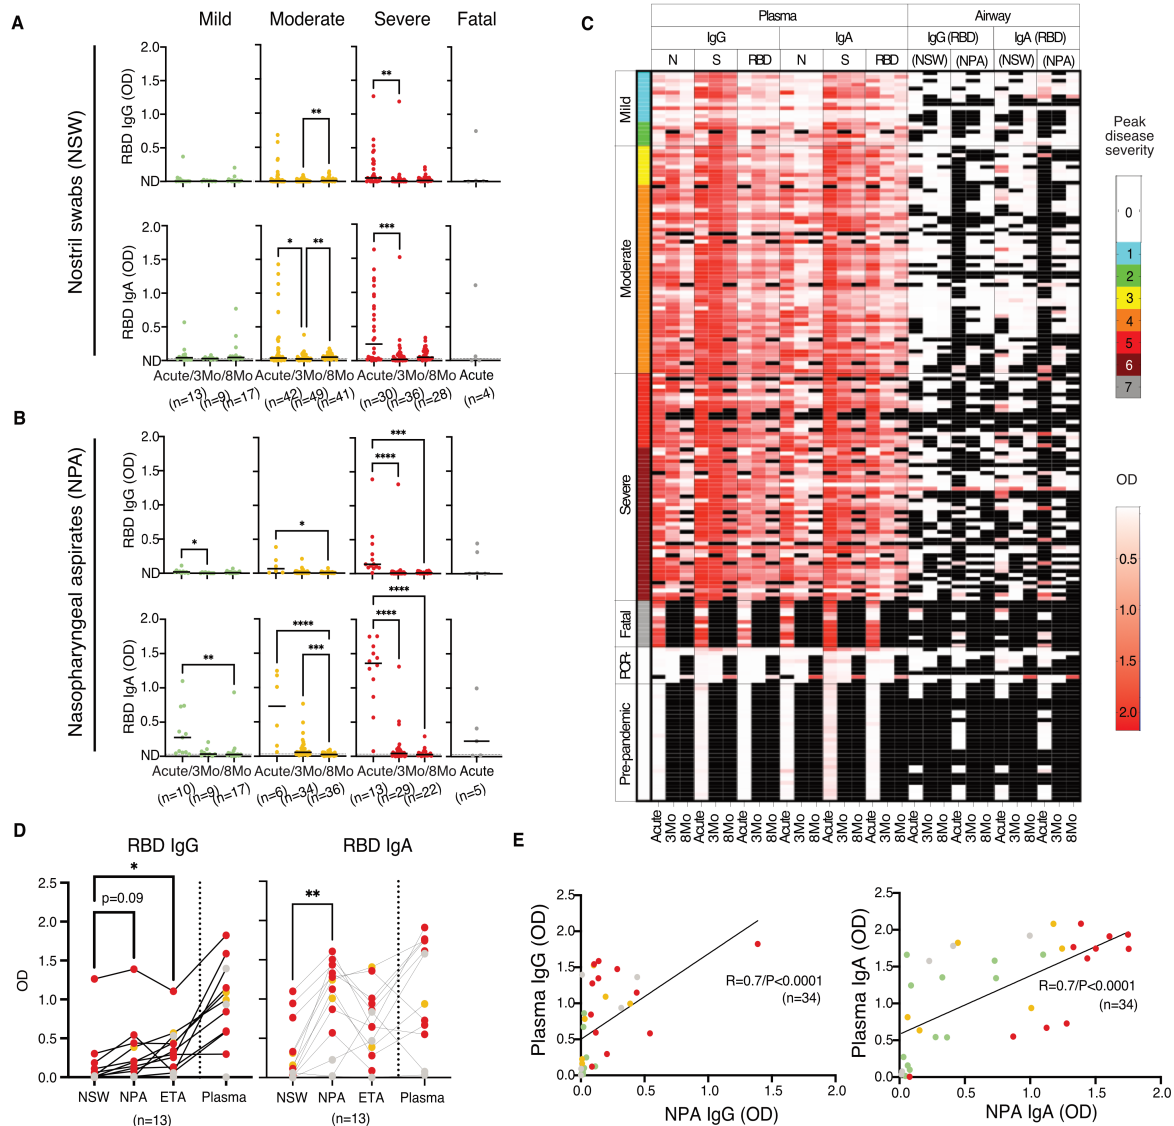

**Figure 4. Longitudinal airway antibody responses to RBD across COVID-19 severity from acute disease up to 8 months from symptom onset.** Levels of IgG and IgA to RBD in **(A)** nostrils swabs (NSW) and **(B)** nasopharyngeal aspirates (NPA). The black lines indicate median values. Kruskal-Wallis with Dunn's multiple comparisons was used to compare the groups and considered statistically significant at  $p<0.05$ . \* $p<0.05$  \*\*  $p<0.01$ , \*\*\*  $p<0.001$ , \*\*\*\*  $p<0.0001$ . In A) the line overlaps with not detected (ND) for IgG levels. **(C)** Heat map generated grouping patients according to PDS showing acute and convalescent IgG and IgA titers against N, S and RBD (plasma) and RBC (NSW, NPA and ETA) for each patient. The heat map includes data from patients (n=147) and also data from PPHC (n=30) and PCR-individuals (n=9) (indicated with PDS 0). Missing data and not available samples are shown in black. **(D)** Comparison of the levels of RBD IgG/A in patient-matched NSW, NPA, endotracheal aspirates (ETA) and plasma collected at the same time point. The black lines connect data points from the same individuals. Friedman test with Dunn's multiple comparisons test was used to compare the groups and considered statistically significant at  $p<0.05$ . \*\*\*\*  $p<0.0001$ . **(E)** Spearman correlation for NPA (n=34) versus plasma immunoglobulins against the RBD during acute disease.

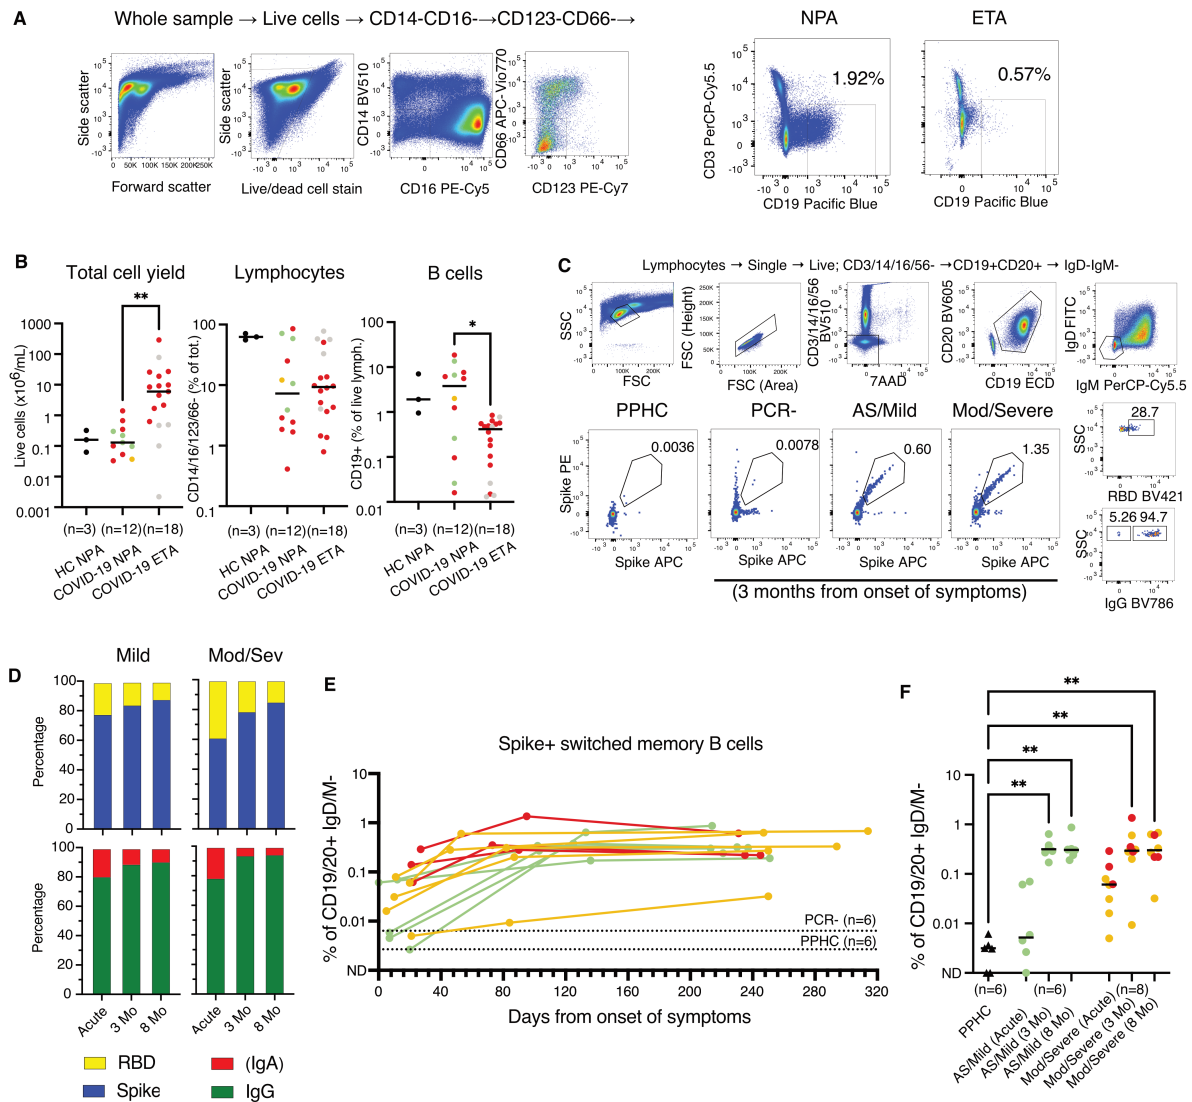

**Figure 5. Assessment of frequencies of B cells in the respiratory tract and of circulating S-specific memory B cells. (A)** Representative example with gating strategy for the identification of lymphocytes (identified as negative for CD14/16/123/66) and of total B cells (CD3-CD19+) in respiratory NPA and ETA samples. **(B)** Lymphocytes and total B cells in NPA and ETA in a subset of patients alongside with NPA from healthy controls. Kruskal-Wallis with Dunn's multiple comparisons test was used and considered statistically significant at  $p < 0.05$ . \*\*  $p < 0.01$ . **(C)** Representative examples with gating strategy of SARS-Cov-2 S-specific memory B cells from one pre-pandemic healthy control, 3-month follow-up samples from one SARS-CoV-2 PCR-individual and one mild and one moderate/severe COVID-19 patient. Further characterization of S-positive memory B cells on RBD binding and B cell isotype (IgG+ or IgA+ assumed to correspond to IgD-IgM-IgG- B cells). **(D)** Bar charts show the cumulative proportion (frequency) of Spike (blue) and RBD (yellow) specific memory B cell as well as the proportion of IgG (green) vs. IgA (red) isotypes among the Spike specific memory B cells in longitudinal samples from mild ( $n=6$ ) and moderate/severe ( $n=8$ ) COVID-19 patients. **(E)** Frequencies of S-specific memory B cells in matched acute (filled) and 3-month follow-up (filled with black lining) PBMCs in relation to days in the subset of individuals analyzed ( $n=14$ ) color-coded according to PDS. Dotted lines on indicate the average background staining for PCR- and PPHC. **(F)** Levels of circulating Spike+ switched memory B cells during acute disease and convalesce in the subset of patients analyzed, as well as PPHC, color-coded according to PDS. Circles with black lining refer to data during the convalescent phase. Black triangles symbolize the PPHC. Differences were assessed using Kruskal-Wallis with Dunn's multiple comparisons test and considered statistically significant at  $p < 0.05$ . \*\*  $p < 0.01$ .

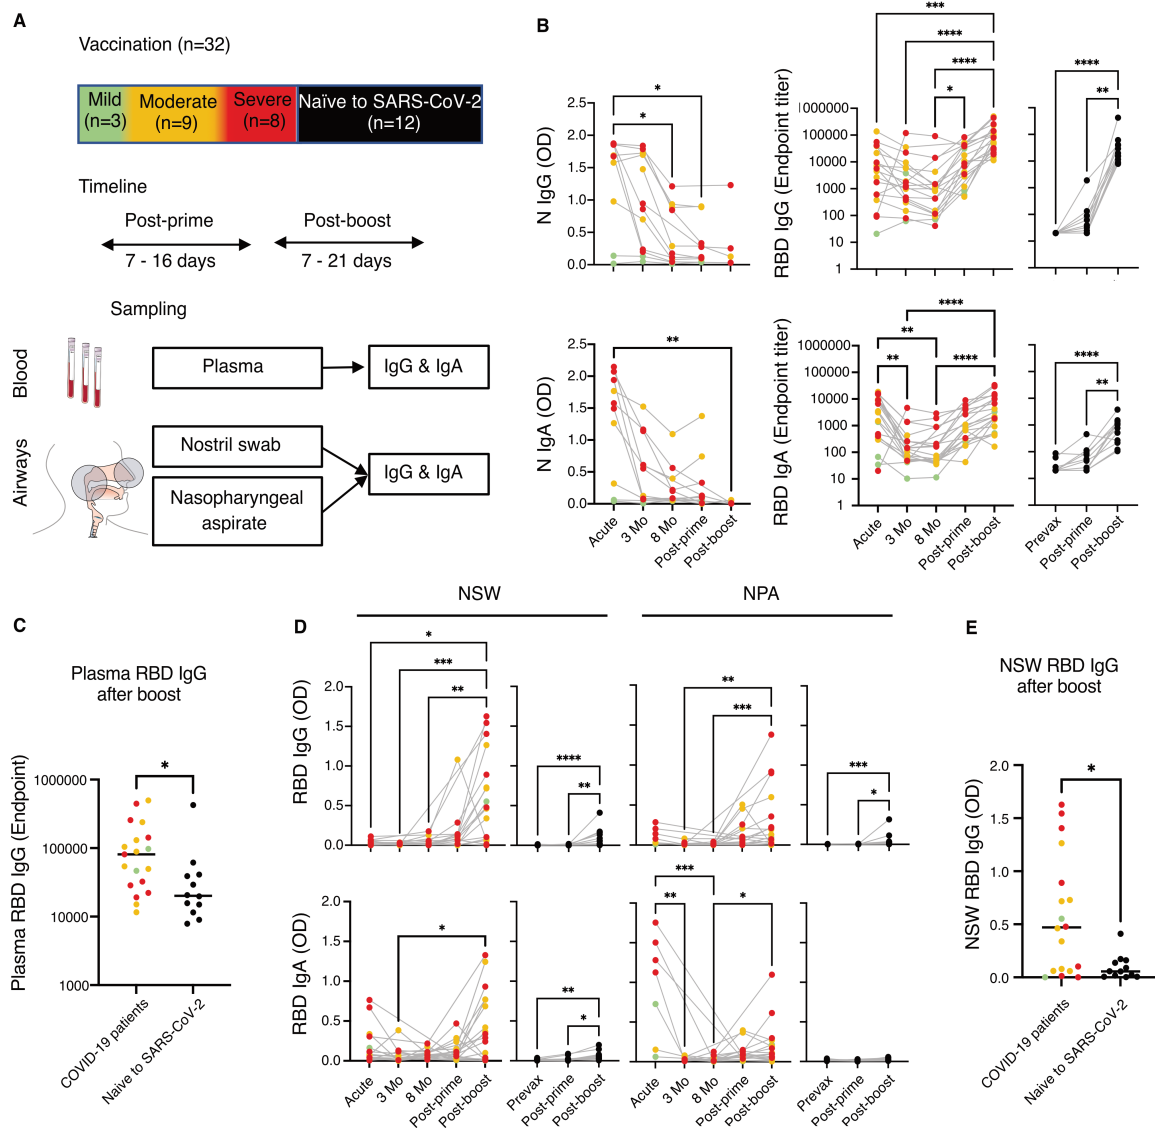

**Figure 6. Vaccination and systemic and airway antibody level rebound.** (A) Overview of vaccinated patients (n=20) with respect to peak disease severity during COVID-19 and sampling timeline after prime and boost as compared with vaccination in individuals naïve to SARS-CoV-2 (n=12). The anatomical compartments analyzed and the measurements performed are also shown. (B) Compiled patient-matched longitudinal data from acute, 3-month- and 8-month follow-ups are shown together with data from after prime and after boost for the levels of plasma IgG and IgA against N and RBD. (C) Direct comparison between plasma RBD IgG after boost in COVID-19 patients and individuals naïve to SARS-CoV-2. (D) Compiled data as above for RBD IgG and IgA in NSW and NPA. (E) Direct comparison between NSW RBD IgG after boost in COVID-19 patients and individuals naïve to SARS-CoV-2. The grey lines connect data points from the same individuals. Data are color-coded according to peak disease severity during COVID-19 with data from individuals naïve to SARS-CoV-2 shown in black as a comparison. Differences were assessed using Kruskal-Wallis with Dunn's multiple comparisons test and considered statistically significant at  $p < 0.05$ . \*\*  $p < 0.01$ , \*\*\*  $p < 0.001$ , \*\*\*\*  $p < 0.0001$ .
